# Supplementary material for: Benefits and harms of screening for hepatocellular carcinoma in high-risk populations: systematic review and meta-analysis
Source: PubMed Central journal article supplement — J Natl Cancer Cent. 2023 Feb 24;3(3):175–85. doi: 10.1016/j.jncc.2023.02.001 (PMC11256723; doi:10.1016/j.jncc.2023.02.001), 2023-02-24
Supplement: mmc1.pdf [file mmc1.pdf]

## **Supplementary materials**

### **Benefits and harms of screening for hepatocellular carcinoma in high-risk populations: a systematic review and meta-analysis**

Jichun Yang, Zhirong Yang, Xueyang Zeng, Shuqing Yu, Le Gao, Yu Jiang, Feng Sun

**Supplementary Table 1.**

Search strategy.

| <i>Search strategy of Pubmed (English database)</i> |                                                                                                                                                                                                                                                                                                                                                                                                                                                                                                                                                                                                                                                                                                                                                                                                                                                                                                                                                                                                                                                          |
|-----------------------------------------------------|----------------------------------------------------------------------------------------------------------------------------------------------------------------------------------------------------------------------------------------------------------------------------------------------------------------------------------------------------------------------------------------------------------------------------------------------------------------------------------------------------------------------------------------------------------------------------------------------------------------------------------------------------------------------------------------------------------------------------------------------------------------------------------------------------------------------------------------------------------------------------------------------------------------------------------------------------------------------------------------------------------------------------------------------------------|
| #1                                                  | ((((((Carcinoma[ti] OR tumor[ti] OR cancer[ti] OR neoplasm[ti])) AND (Liver[ti] OR hepatocellular[ti] OR hepatic[ti]))) OR (Hcc[ti] OR hepatoma[ti])) OR "Liver Neoplasms"[Mesh]) OR "Carcinoma, hepatocellular"[Mesh])                                                                                                                                                                                                                                                                                                                                                                                                                                                                                                                                                                                                                                                                                                                                                                                                                                  |
| #2                                                  | ((("Mass Screening"[Mesh]) OR "Early Detection of Cancer"[Mesh]) OR (screening[ti] OR screen[ti] OR screened[ti] OR surveillance[ti] OR "early detection"[ti]))                                                                                                                                                                                                                                                                                                                                                                                                                                                                                                                                                                                                                                                                                                                                                                                                                                                                                          |
| #3                                                  | ((((((("Tomography, X-Ray Computed"[Mesh]) OR ("Computed tomography"[ti] OR "CT"[ti]))) OR (((DCP[ti] OR "Des-gamma carboxyprothrombin"[ti] OR PIVKA*[ti] OR PIVKA-II[ti] OR "PIVKA II"[ti] OR "Protein induced by vitamin K absence*" [ti])) OR (AFP-L3[ti] OR "AFP L3"[ti] OR "Lens culinaris agglutinin-reactive alpha-fetoprotein"[ti] OR "lectin-bound AFP"[ti] OR "L3 fraction"[ti] OR "L3-fraction"[ti] OR "glycosylated AFP"[ti]))) OR ((("alpha-Fetoproteins"[Mesh]) OR (alpha-fetoproteins[ti] OR alpha-fetoprotein[ti] OR "alpha fetoprotein"[ti] OR AFP[ti] OR alpha-1-fetoprotein[ti] OR "alpha1fetoprotein"[ti] OR "alpha 1 fetoprotein"[ti] OR alpha-fetoglobulin[ti] OR "alpha fetoglobulin"[ti]))) OR ((("Magnetic Resonance Imaging"[Mesh]) OR ("Magnetic resonance imaging"[ti] OR "MRI"[ti]))) OR (((ultrason*[ti] OR ultrasound*[ti] OR ultrasonography[ti] OR echograph*[ti] OR echotomograph*[ti] OR doppler*[ti] OR B-mode[ti] OR B-scan[ti] OR grey*scale[ti] OR sonogram[ti] OR sonography[ti])) OR "Ultrasonography"[Mesh]))) |
| #4                                                  | #2 and #3                                                                                                                                                                                                                                                                                                                                                                                                                                                                                                                                                                                                                                                                                                                                                                                                                                                                                                                                                                                                                                                |
| #5                                                  | #1 and #4                                                                                                                                                                                                                                                                                                                                                                                                                                                                                                                                                                                                                                                                                                                                                                                                                                                                                                                                                                                                                                                |
| #6                                                  | (Animals[Mesh] NOT humans[Mesh])                                                                                                                                                                                                                                                                                                                                                                                                                                                                                                                                                                                                                                                                                                                                                                                                                                                                                                                                                                                                                         |
| #7                                                  | #5 NOT#6                                                                                                                                                                                                                                                                                                                                                                                                                                                                                                                                                                                                                                                                                                                                                                                                                                                                                                                                                                                                                                                 |
| <i>Search strategy of Embase (English database)</i> |                                                                                                                                                                                                                                                                                                                                                                                                                                                                                                                                                                                                                                                                                                                                                                                                                                                                                                                                                                                                                                                          |
| #1                                                  | (liver:ti OR hepatocellular:ti OR hepatic:ti) AND (carcinoma:ti OR tumor:ti OR cancer:ti OR neoplasm:ti) OR hcc:ti OR hepatoma:ti OR 'liver neoplasms'/exp OR 'hepatocellular carcinoma'/exp                                                                                                                                                                                                                                                                                                                                                                                                                                                                                                                                                                                                                                                                                                                                                                                                                                                             |
| #2                                                  | screening:ti OR screen:ti OR screened:ti OR surveillance:ti OR 'early detection':ti OR 'mass screening'/exp OR 'early detection of cancer'/exp                                                                                                                                                                                                                                                                                                                                                                                                                                                                                                                                                                                                                                                                                                                                                                                                                                                                                                           |
| #3                                                  | ultrason*:ti OR ultrasound*:ti OR ultrasonography:ti OR echograph*:ti OR echotomograph*:ti OR doppler*:ti OR 'b mode':ti OR 'b scan':ti OR grey*scale:ti OR 'sonogram':ti OR sonogram:ti OR 'sonography':ti OR sonography:ti OR 'ultrasonography'/exp OR 'alpha-fetoproteins':ti OR 'alpha-fetoprotein':ti OR 'alpha fetoprotein':ti OR afp:ti OR 'alpha-1-fetoprotein':ti OR 'alpha1fetoprotein':ti OR 'alpha 1 fetoprotein':ti OR 'alpha fetoglobulin':ti OR 'alpha-fetoproteins'/exp OR 'afp l3':ti OR 'lens                                                                                                                                                                                                                                                                                                                                                                                                                                                                                                                                          |

|                                                                          |                                                                                                                                                                                                                                                                                                                                                                                                                                                                                                                                                                                                                                                                                                                                                                                                                                                                                                                                                                                                                                                               |
|--------------------------------------------------------------------------|---------------------------------------------------------------------------------------------------------------------------------------------------------------------------------------------------------------------------------------------------------------------------------------------------------------------------------------------------------------------------------------------------------------------------------------------------------------------------------------------------------------------------------------------------------------------------------------------------------------------------------------------------------------------------------------------------------------------------------------------------------------------------------------------------------------------------------------------------------------------------------------------------------------------------------------------------------------------------------------------------------------------------------------------------------------|
|                                                                          | culinaris agglutinin-reactive alpha-fetoprotein':ti OR 'lectin-bound afp':ti OR 'l3 fraction':ti OR 'l3-fraction':ti OR 'glycosylated afp':ti OR dcp:ti OR 'des-gamma carboxyprothrombin':ti OR pivka*:ti OR 'pivka ii':ti OR 'protein induced by vitamin k absence*':ti OR 'computed tomography':ti OR 'ct':ti OR 'tomography, x-ray computed'/exp OR 'magnetic resonance imaging':ti OR 'mri':ti OR 'magnetic resonance imaging'/exp                                                                                                                                                                                                                                                                                                                                                                                                                                                                                                                                                                                                                        |
| #4                                                                       | #2 and #3                                                                                                                                                                                                                                                                                                                                                                                                                                                                                                                                                                                                                                                                                                                                                                                                                                                                                                                                                                                                                                                     |
| #5                                                                       | #1 and #4                                                                                                                                                                                                                                                                                                                                                                                                                                                                                                                                                                                                                                                                                                                                                                                                                                                                                                                                                                                                                                                     |
| #6                                                                       | [humans]/lim AND ('english':la OR 'chinese':la)                                                                                                                                                                                                                                                                                                                                                                                                                                                                                                                                                                                                                                                                                                                                                                                                                                                                                                                                                                                                               |
| #7                                                                       | #5 and #6                                                                                                                                                                                                                                                                                                                                                                                                                                                                                                                                                                                                                                                                                                                                                                                                                                                                                                                                                                                                                                                     |
| <b><i>Search strategy of the Cochrane library (English database)</i></b> |                                                                                                                                                                                                                                                                                                                                                                                                                                                                                                                                                                                                                                                                                                                                                                                                                                                                                                                                                                                                                                                               |
| #5                                                                       | #1 MeSH descriptor: [Liver Neoplasms] explode all trees<br>#2 MeSH descriptor: [Carcinoma, Hepatocellular] explode all trees<br>#3 Hcc:ti or hepatocellular:ti (Word variations have been searched)<br>#4 ((Carcinoma or tumor or cancer or neoplasm) and (Liver or hepatocellular or hepatic)):ti (Word variations have been searched)<br>#5 #1 or #2 or #3 or #4                                                                                                                                                                                                                                                                                                                                                                                                                                                                                                                                                                                                                                                                                            |
| #9                                                                       | #6 MeSH descriptor: [Mass Screening] explode all trees<br>#7 MeSH descriptor: [Early Detection of Cancer] explode all trees<br>#8 (Screening or screen or screened or surveillance or "early detection"):ti (Word variations have been searched)<br>#9 #6 or #7 or #8                                                                                                                                                                                                                                                                                                                                                                                                                                                                                                                                                                                                                                                                                                                                                                                         |
| #15                                                                      | #10 MeSH descriptor: [Ultrasonography] explode all trees<br>#11 (ultrason* or ultrasound* or ultrasonography or echograph* or echotomograph* or doppler* or 'b mode' or 'b scan' or grey*scale or 'sonogram' or sonogram or 'sonography' or sonography):ti (Word variations have been searched)<br>#12 #10 or #11<br>#13 MeSH descriptor: [alpha-Fetoproteins] explode all trees<br>#14 (alpha-fetoproteins or alpha-fetoprotein'or 'alpha fetoprotein' or afp or 'alpha 1 fetoprotein' or 'alpha 1 fetoprotein' or 'alpha fetoglobulin'):ti (Word variations have been searched)<br>#15 #13 or #14<br>#16 (AFP-L3 or "AFP L3" or "Lens culinaris agglutinin-reactive alpha-fetoprotein" or "lectin-bound AFP" or "L3 fraction" or "L3-fraction" or "glycosylated AFP"):ti (Word variations have been searched)<br>#17 (DCP or "Des-gamma carboxyprothrombin" or PIVKA* or PIVKA-II or "PIVKA II" or "Protein induced by vitamin K absence*"):ti (Word variations have been searched)<br>#18 ("Magnetic resonance imaging" or "MRI"):ti (Word variations have |

|                                                                        |                                                                                                                                                                                                                                                                                                                                                                                                                                                                                                                                                                                                                                                                                                                                                                                                                                                                                                                                                                                                             |
|------------------------------------------------------------------------|-------------------------------------------------------------------------------------------------------------------------------------------------------------------------------------------------------------------------------------------------------------------------------------------------------------------------------------------------------------------------------------------------------------------------------------------------------------------------------------------------------------------------------------------------------------------------------------------------------------------------------------------------------------------------------------------------------------------------------------------------------------------------------------------------------------------------------------------------------------------------------------------------------------------------------------------------------------------------------------------------------------|
|                                                                        | <p>been searched)</p> <p>#19 MeSH descriptor: [Magnetic Resonance Imaging] explode all trees</p> <p>#20 #18 or #19</p> <p>#21 MeSH descriptor: [Tomography, X-Ray Computed] explode all trees</p> <p>#22 ("Computed tomography" or "CT"):ti (Word variations have been searched)</p> <p>#23 #21 or #22</p> <p>#24 #12 or #15 or #16 or #17 or #20 or #23</p>                                                                                                                                                                                                                                                                                                                                                                                                                                                                                                                                                                                                                                                |
| #26                                                                    | #24 AND #9                                                                                                                                                                                                                                                                                                                                                                                                                                                                                                                                                                                                                                                                                                                                                                                                                                                                                                                                                                                                  |
| #27                                                                    | #5 AND#26                                                                                                                                                                                                                                                                                                                                                                                                                                                                                                                                                                                                                                                                                                                                                                                                                                                                                                                                                                                                   |
| <b><i>Search strategy of Clinicaltrials.gov (English database)</i></b> |                                                                                                                                                                                                                                                                                                                                                                                                                                                                                                                                                                                                                                                                                                                                                                                                                                                                                                                                                                                                             |
| #1                                                                     | <p>liver cancer OR liver neoplasm OR liver tumour OR liver carcinoma OR hepatocellular carcinoma OR hepatic cancer OR hepatic carcinoma OR HCC   screen OR surveillance OR 'early detection of cancer' OR 'mass screening' <b>Applied Filters:</b>  Completed</p>                                                                                                                                                                                                                                                                                                                                                                                                                                                                                                                                                                                                                                                          |
| <b><i>Search strategy of Web of science (English database)</i></b>     |                                                                                                                                                                                                                                                                                                                                                                                                                                                                                                                                                                                                                                                                                                                                                                                                                                                                                                                                                                                                             |
| #1                                                                     | <p>((TI=(Liver OR hepatocellular OR hepatic ) AND TI=(Carcinoma OR tumor OR cancer OR neoplasm )) OR TI=(Hcc OR hepatoma)) AND (TI=(screening OR screen OR screened OR surveillance OR "early detection")) AND (TI=("Tomography, X-Ray Computed" OR "Computed tomography" OR "CT" OR DCP OR "Des-gamma carboxyprothrombin" OR PIVKA* OR PIVKA-II OR "PIVKA II" OR "Protein induced by vitamin K absence*" OR AFP-L3 OR "AFP L3" OR "Lens culinaris agglutinin-reactive alpha-fetoprotein" OR "lectin-bound AFP" OR "L3 fraction" OR "L3-fraction" OR "glycosylated AFP" OR alpha-fetoproteins OR alpha-fetoprotein OR "alpha fetoprotein" OR AFP OR alpha-1-fetoprotein OR "alpha1fetoprotein" OR "alpha 1 fetoprotein" OR alpha-fetoglobulin OR "alpha fetoglobulin" OR "Magnetic Resonance Imaging" OR "Magnetic resonance imaging" OR "MRI" OR ultrason* OR ultrasound* OR ultrasonography OR echograph* OR echotomograph* OR doppler* OR B-mode OR B-scan OR grey*scale OR sonogram OR sonography))</p> |
| <b><i>Search strategy of Google scholar (English database)</i></b>     |                                                                                                                                                                                                                                                                                                                                                                                                                                                                                                                                                                                                                                                                                                                                                                                                                                                                                                                                                                                                             |
| #1                                                                     | <p>allintitle: (("liver cancer" OR "liver neoplasm" OR "liver tumour" OR "liver carcinoma" OR "hepatocellular carcinoma" OR "hepatic cancer" OR "hepatic carcinoma" OR "HCC")) AND ("screen" OR "surveillance" OR "early detection"))</p>                                                                                                                                                                                                                                                                                                                                                                                                                                                                                                                                                                                                                                                                                                                                                                   |
| <b><i>Search strategy of CNKI (Chinese database)</i></b>               |                                                                                                                                                                                                                                                                                                                                                                                                                                                                                                                                                                                                                                                                                                                                                                                                                                                                                                                                                                                                             |

|                                                      |                                                                                                                                                                                                                                                                                                                                                                                                      |
|------------------------------------------------------|------------------------------------------------------------------------------------------------------------------------------------------------------------------------------------------------------------------------------------------------------------------------------------------------------------------------------------------------------------------------------------------------------|
| #1 (Chinese)                                         | SU =("肝癌"+"肝肿瘤"+"肝细胞癌"+"原发性肝癌"+"肝脏肿瘤")*( "筛查"+"监测"+"早期检测")*( "超声"+"甲胎蛋白"+"AFP"+"AFP-L3"+"甲胎蛋白-L3"+"甲胎蛋白异质体"+"异常凝血酶原"+"DCP"+CT+MRI+"核磁")                                                                                                                                                                                                                                                              |
| Translation                                          | SU = ("hepatocellular carcinoma"+"liver cancer"+"hepatocellular carcinoma"+"primary liver cancer"+" liver tumor ") * ("screening"+"surveillance"+"early detection ") * ("ultrasonography" + "alpha fetal protein" + "AFP" + "alpha fetal proteinL-3" + "AFP-L3" + "molecular heterogenetic of AFP" + "abnormal prothrombin" + "DCP+CT+MRI+"Magnetic resonance imaging")                              |
| <b>Search strategy of WanFang (Chinese database)</b> |                                                                                                                                                                                                                                                                                                                                                                                                      |
| #1 (Chinese)                                         | 主题:( "肝癌"+"肝肿瘤"+"肝细胞癌"+"原发性肝癌"+"肝脏肿瘤")*(主题: ( "筛查"+"监测"+"早期检测") *主题: ( "超声"+"甲胎蛋白"+"AFP"+"AFP-L3"+"甲胎蛋白-L3"+"甲胎蛋白异质体"+"异常凝血酶原"+"DCP"+CT+MRI+"核磁")                                                                                                                                                                                                                                                    |
| Translation                                          | Theme: ("hepatocellular carcinoma"+"liver cancer"+"hepatocellular carcinoma "+"primary liver cancer"+" liver tumor ") * ("screening"+"surveillance"+" early detection ") * ("ultrasonography" + "alpha fetal protein" + "AFP" + "alpha fetal proteinL-3" + "AFP-L3" + "molecular heterogenetic of AFP" + "abnormal prothrombin" + "DCP+CT+MRI+"Magnetic resonance imaging")                          |
| <b>Search strategy of WanFang (Chinese database)</b> |                                                                                                                                                                                                                                                                                                                                                                                                      |
| #1 (Chinese)                                         | (M=肝癌 OR M=肝肿瘤 OR M=肝细胞癌 OR M=原发性肝癌 OR M=肝脏肿瘤) AND (M=筛查 OR M=监测 OR M=早期检测) AND (M=超声 OR M=甲胎蛋白 OR M=AFP OR M=AFP-L3 OR M=甲胎蛋白-L3 OR M=甲胎蛋白异质体 OR M=异常凝血酶原 OR M=DCP OR M=CT OR M=MRI OR M=核磁)                                                                                                                                                                                                        |
| Translation                                          | (M= liver cancer OR M= liver cancer OR M= hepatocellular carcinoma OR M= primary liver cancer OR M= liver tumor) AND (M= screening OR M= surveillance OR M= early detection) AND (M= ultrasound OR M= alpha-fetoprotein OR M=AFP OR M=AFP-L3 OR M= alpha-fetoprotein -L3 OR M= molecular heterogenetic of AFP OR M= abnormal prothrombin OR M=DCP OR M=CT OR M=MRI OR M= Magnetic resonance imaging) |
| <b>Search strategy of Sinomed (Chinese database)</b> |                                                                                                                                                                                                                                                                                                                                                                                                      |
| #1 (Chinese)                                         | ("肝癌"[中文标题:智能]) OR ("肝肿瘤"[中文标题:智能]) OR ("肝细胞癌"[中文标题:智能]) OR ("原发性肝癌"[中文标题:智能]) OR ("肝脏肿瘤"[中文标题:智能])                                                                                                                                                                                                                                                                                                  |
| Translation                                          | ( 'liver cancer [Chinese title: intelligent]) OR ('liver tumors'[Chinese title: intelligent]) OR ('hepatocellular carcinoma [Chinese title: intelligent]) OR ('primary liver cancer'[Chinese title: intelligent]) OR (' liver tumor [Chinese title: intelligent])                                                                                                                                    |
| #2 (Chinese)                                         | "肝肿瘤"[不加权:扩展]                                                                                                                                                                                                                                                                                                                                                                                        |

|                    |                                                                                                                                                                                                                                                                                                                                                                                                                                                                                                                                                |
|--------------------|------------------------------------------------------------------------------------------------------------------------------------------------------------------------------------------------------------------------------------------------------------------------------------------------------------------------------------------------------------------------------------------------------------------------------------------------------------------------------------------------------------------------------------------------|
| <i>Translation</i> | <i>Liver tumor [unweighted: extended]</i>                                                                                                                                                                                                                                                                                                                                                                                                                                                                                                      |
| #3                 | #1 OR #2                                                                                                                                                                                                                                                                                                                                                                                                                                                                                                                                       |
| #4 (Chinese)       | ("筛查"[中文标题:智能]) OR ("监测"[中文标题:智能]) OR ("早期检测"[中文标题:智能])                                                                                                                                                                                                                                                                                                                                                                                                                                                                                        |
| <i>Translation</i> | (" screening "[Chinese title: intelligent]) OR (" surveillance" [Chinese title: intelligent]) OR (" early detection "[Chinese title: intelligent])                                                                                                                                                                                                                                                                                                                                                                                             |
| #5 (Chinese)       | ("超声"[中文标题:智能]) OR ("甲胎蛋白"[中文标题:智能]) OR "AFP"[中文标题:智能]) OR ("AFP-L3"[中文标题:智能]) OR ("甲胎蛋白-L3"[中文标题:智能]) OR ("甲胎蛋白异质体"[中文标题:智能]) OR "异常凝血酶原"[中文标题:智能]) OR ("DCP"[中文标题:智能]) OR ("CT"[中文标题:智能]) OR ("MRI"[中文标题:智能]) OR ("核磁"[中文标题:智能])                                                                                                                                                                                                                                                                                                             |
| <i>Translation</i> | <i>('ultrasonic [Chinese title: intelligent]) OR ("AFP"[Chinese title: intelligent]) OR αlpha-fetoprotein"[Chinese title: intelligent]) OR ("AFP - L3 [Chinese title: intelligent]) OR ("AFP - L3"[Chinese title: intelligent]) OR ("molecular heterogenetic of AFP [Chinese title: intelligent]) OR"abnormal prothrombin [Chinese title: intelligent]) OR (" DCP"[Chinese title: intelligent]) OR ("CT [Chinese title: intelligent]) OR ("MRI"[Chinese title: intelligent]) OR ("Magnetic resonance imaging [Chinese title: intelligent])</i> |
| #6                 | #4 and #5                                                                                                                                                                                                                                                                                                                                                                                                                                                                                                                                      |

**Supplementary Table 2**

Characteristics of included studies.

| Included studies                          | Study location | Study design | Screening    | Comparators  | Screening population (S/C) | HCC (S/C) | Proportion of Child-Pugh C | Adjusted lead-time | Proportion male (%) | Age   | Outcomes |
|-------------------------------------------|----------------|--------------|--------------|--------------|----------------------------|-----------|----------------------------|--------------------|---------------------|-------|----------|
| Chen JG, et al. 2003. 5y <sup>1</sup>     | China          | RCT          | AFP/6M       | No-Screening | HBV (3,172/1,896)          | 217/117   | NA                         | No                 | 100.00              | 41.15 | ①②③④⑤    |
| Zhang BH, et al. 2004. 5y <sup>2</sup>    | China          | RCT          | AFP+US/6M    | No-Screening | HBV (9,373/9,433)          | 86/67     | NA                         | No                 | NA                  | 41.50 | ①②③④⑤    |
| Lu J. 2001. 5y <sup>3</sup>               | China          | RCT          | AFP+US/3M    | No-Screening | HBV (278/149)              | 92/34     | NA                         | No                 | 73.80               | 45.60 | ①②③④     |
| Ji MF, et al. 2018. 4y <sup>4</sup>       | China          | RCT          | AFP+US/6M    | No-Screening | HBV (17,966/50,544)        | 57/104    | NA                         | No                 | NA                  | 44.50 | ①⑤       |
| Ando et al. 2006. 5y <sup>5</sup>         | Japan          | Cohort study | AFP+US/NA    | No-Screening | Cirrhosis                  | 392/182   | 36.40%                     | No                 | 65.30               | 64.40 | ①④③      |
| Bui et al. 2019. 5y <sup>6</sup>          | USA            | Cohort study | AFP or US/NA | No-Screening | Cirrhosis (3,376/2,755)    | 91/54     | NA                         | No                 | NA                  | 68.25 | ⑤        |
| Caumes et al. 2007. 3y <sup>7</sup>       | France         | Cohort study | US/NA        | No-Screening | CLD                        | 30/76     | 37.70%                     | No                 | 93.40               | 66.35 | ①        |
| Chaiteerakij et al. 2017. 1y <sup>8</sup> | Thailand       | Cohort study | US > 12M     | No-Screening | CH                         | 103/343   | 1.12%                      | No                 | 78.70               | 58.40 | ①        |

|                                           |           |              |                  |                    |                   |         |        |    |        |       |          |
|-------------------------------------------|-----------|--------------|------------------|--------------------|-------------------|---------|--------|----|--------|-------|----------|
| Chen TH, et al. 2002. 7y <sup>9</sup>     | China     | Cohort study | US/6M            | No-Screening       | CLD (4,385/458)   | 877/100 | NA     | No | 76.90  | NA    | ③⑤       |
| Cheung et al. 2006. 3y <sup>10</sup>      | China     | Cohort study | AFP+US/NA        | No-Screening       | CH                | 97/126  | 23.32% | No | 80.30  | 64.00 | ①        |
| Chen JG, et al. 2017. 5y <sup>11</sup>    | China     | Cohort study | AFP+US/6M        | No-Screening       | HBV (3,712/1,869) | 186/82  | NA     | No | 100.00 | 41.15 | ②④③      |
| Chin et al. 2016. 7y <sup>12</sup>        | Australia | Cohort study | US/6M            | No-Screening       | Cirrhosis         | 54/58   | NA     | No | NA     | NA    | ①        |
| Chinnaratha et al. 2019. 1y <sup>13</sup> | Australia | Cohort study | US/6M            | No-Screening       | CLD               | 24/106  | NA     | No | NA     | NA    | ① ②<br>③ |
| Costentin et al. 2016. 4y <sup>14</sup>   | France    | Cohort study | US/6M            | No-Screening       | Cirrhosis         | 113/74  | NA     | No | NA     | 58.00 | ③        |
| Davila et al. 2007. 5y <sup>15</sup>      | USA       | Cohort study | AFP<br>US/12M    | or<br>No-Screening | CLD               | 44/113  | 36.31% | No | NA     | 57.50 | ②③       |
| Demma et al. 2016. 3y <sup>16</sup>       | UK        | Cohort study | US/6M            | No-Screening       | Cirrhosis         | 108/97  | NA     | No | NA     | NA    | ②        |
| Dixon et al. 2018. 3y <sup>17</sup>       | UK        | Cohort study | AFP<br>US/6M     | or<br>No-Screening | CLD               | 25/76   | 5.00%  | No | 75.00  | 71.00 | ①③       |
| El-Serag et al. 2011. 5y <sup>18</sup>    | USA       | Cohort study | AFP+US/6-12<br>M | No-Screening       | HCV               | 580/332 | NA     | No | NA     | 58.10 | ②④③      |
| El-Zayadi et al. 2010. 5y <sup>19</sup>   | Egypt     | Cohort study | AFP+US/6M        | No-Screening       | Cirrhosis         | 122/473 | 50.08% | No | 84.90  | 54.55 | ①        |



|                                         |            |              |              |                    |           |         |        |     |       |       |          |
|-----------------------------------------|------------|--------------|--------------|--------------------|-----------|---------|--------|-----|-------|-------|----------|
| Eltabbakh et al. 2015. 5y <sup>20</sup> | Egypt      | Cohort study | AFP+US/6M    | No-Screening       | Cirrhosis | 102/155 | 5.80%  | No  | NA    | 55.05 | ①        |
| Farrell et al. 2015. 4y <sup>21</sup>   | UK         | Cohort study | US/6M        | No-Screening       | Cirrhosis | 31/400  | NA     | No  | NA    | NA    | ①        |
| Gaba et al. 2013. 4y <sup>22</sup>      | USA        | Cohort study | US/6-12M     | No-Screening       | CLD       | 97/70   | NA     | No  | 80.80 | 61.00 | ①②③      |
| Garcia et al. 1995. 3y <sup>23</sup>    | Spain      | Cohort study | US/NA        | No-Screening       | Cirrhosis | 34/65   | 27.27% | No  | NA    | NA    | ①        |
| Gellert et al. 2007. 5y <sup>24</sup>   | Australian | Cohort study | AFP<br>US/NA | or<br>No-Screening | CLD       | 27/122  | NA     | No  | 79.90 | NA    | ① ②<br>④ |
| Im S, et al. 2019. 4y <sup>25</sup>     | Korea      | Cohort study | AFP<br>US/6M | or<br>No-Screening | CLD       | 127/192 | 16.9%  | Yes | NA    | NA    | ① ⑤      |
| Jeffrey et al. 2015. 2y <sup>26</sup>   | USA        | Cohort study | AFP<br>US/6M | or<br>No-Screening | Cirrhosis | 162/126 | NA     | No  | 78.10 | 58.50 | ①        |
| Jou et al. 2010. 1y <sup>27</sup>       | USA        | Cohort study | US/6M-12M    | No-Screening       | Cirrhosis | 98/221  | 10.03% | No  | 77.50 | NA    | ①        |
| Kemp et al. 2005. 12y <sup>28</sup>     | Australian | Cohort study | AFP+US/6M    | No-Screening       | CLD       | 41/55   | 18.75% | No  | 82.30 | 60.00 | ②③       |
| Khalaf et al. 2016. 1y <sup>29</sup>    | USA        | Cohort study | US/NA        | No-Screening       | Cirrhosis | 145/373 | NA     | No  | 99.40 | 65.70 | ①        |
| Kim et al. 2018. 5y <sup>30</sup>       | Korea      | Cohort study | AFP+US/6M    | No-Screening       | HBV       | 834/464 | 3.50%  | Yes | NA    | 57.70 | ①        |

|                                         |           |              |                 |              |           |           |        |     |       |       |          |
|-----------------------------------------|-----------|--------------|-----------------|--------------|-----------|-----------|--------|-----|-------|-------|----------|
| Kuo et al. 2010. 3y <sup>31</sup>       | USA       | Cohort study | AFP+US/6-12M    | No-Screening | Cirrhosis | 318/1,118 | 20.90% | No  | 74.40 | 59.55 | ①③       |
| Leykum et al. 2007. 6y <sup>32</sup>    | USA       | Cohort study | AFP or US/6-12M | No-Screening | HCV       | 16/56     | NA     | No  | NA    | 56.40 | ①③       |
| Martínez et al. 1993. 1y <sup>33</sup>  | Spain     | Cohort study | AFP+US/NA       | No-Screening | Cirrhosis | 43/92     | NA     | No  | NA    | NA    | ①        |
| Miquel et al. 2012. 7y <sup>34</sup>    | USA       | Cohort study | AFP+US/NA       | No-Screening | Cirrhosis | 56/54     | NA     | No  | NA    | NA    | ①        |
| Mittal R, et al. 2016. 2y <sup>35</sup> | USA       | Cohort study | US/6M           | No-Screening | HBV       | 94/50     | NA     | Yes | 79.90 | NA    | ①        |
| Mittal S, et al. 2016. 5y <sup>36</sup> | USA       | Cohort study | AFP or US/6M    | No-Screening | CLD       | 412/475   | 18.28% | No  | 99.90 | 58.50 | ①        |
| Noda et al. 2010. 6y <sup>37</sup>      | Japan     | Cohort study | US/6M           | No-Screening | HCV       | 124/37    | NA     | No  | 66.50 | 71.25 | ①②④<br>③ |
| Nusbaum et al. 2015. 2y <sup>38</sup>   | USA       | Cohort study | AFP or US/12M   | No-Screening | Cirrhosis | 126/162   | NA     | No  | NA    | NA    | ①        |
| Pascual et al. 2008. 1y <sup>39</sup>   | USA       | Cohort study | US/6M-12M       | No-Screening | Cirrhosis | 117/173   | 14.48% | No  | 75.20 | 68.50 | ①        |
| Piñero et al. 2019. 5y <sup>40</sup>    | Argentina | Cohort study | US/6M           | No-Screening | Cirrhosis | 345/208   | 4.70%  | No  | 77.60 | NA    | ① ④      |
| Poh et al. 2015. 2y <sup>41</sup>       | USA       | Cohort       | AFP+US/6M       | No-Screening | CH        | 87/24     | NA     | No  | 82.00 | 66.50 | ②        |

|                                           |       |              |                 |              |                     |         |        |    |       |       |     |
|-------------------------------------------|-------|--------------|-----------------|--------------|---------------------|---------|--------|----|-------|-------|-----|
|                                           |       | study        |                 |              |                     |         |        |    |       |       |     |
| Rich et al. 2017. 8y <sup>42</sup>        | USA   | Cohort study | AFP+US/NA       | No-Screening | Cirrhosis           | 359/573 | NA     | No | NA    | NA    | ①   |
| Rodríguez et al. 2011. 2y <sup>43</sup>   | Spain | Cohort study | AFP+US/NA       | No-Screening | CLD                 | 86/50   | NA     | No | 71.30 | 66.50 | ①   |
| Sarkar et al. 2012. 11y <sup>44</sup>     | USA   | Cohort study | AFP+US/6-12M    | No-Screening | HBV                 | 14/37   | NA     | No | 78.40 | 50.00 | ①③  |
| Silveira et al. 2008. 7y <sup>45</sup>    | USA   | Cohort study | AFP+US/6-12M    | No-Screening | Cirrhosis           | 17/16   | NA     | No | 36.10 | 69.00 | ①③  |
| Singal et al. 2021. 2y <sup>46</sup>      | USA   | Cohort study | AFP or US/6-12M | No-Screening | Cirrhosis (614/189) | 16/10   | 16.31% | No | 74.30 | 60.95 | ①②⑦ |
| Stravitz et al. 2008. 8y <sup>47</sup>    | USA   | Cohort study | US/6-12M        | No-Screening | Cirrhosis           | 172/107 | 5.40%  | No | 86.00 | 57.00 | ①③  |
| Stroffolini et al. 2011. 1y <sup>48</sup> | Italy | Cohort study | US/6-12M        | No-Screening | Cirrhosis           | 257/154 | 21.91% | No | 72.30 | 67.50 | ①   |
| Tanaka H, et al. 2006. 12y <sup>49</sup>  | USA   | Cohort study | US/6M           | No-Screening | HCV                 | 182/202 | 2.60%  | No | 69.30 | 65.00 | ①④③ |
| Tanaka S et al. 1990. 1y <sup>50</sup>    | Japan | Cohort study | US/3-6M         | No-Screening | CLD                 | 22/83   | NA     | No | NA    | NA    | ①   |
| Taura et al. 2005. 1y <sup>51</sup>       | Japan | Cohort study | AFP+US/NA       | No-Screening | CLD                 | 178/93  | 5.9%   | No | 71.22 | 59.60 | ②   |

|                                               |                |              |              |              |           |             |        |     |       |       |               |
|-----------------------------------------------|----------------|--------------|--------------|--------------|-----------|-------------|--------|-----|-------|-------|---------------|
| Thein et al. 2015. 10y <sup>52</sup>          | USA            | Cohort study | US/6M        | No-Screening | CH        | 302/540     | NA     | Yes | 81.10 | NA    | ② ④<br>③      |
| Tong MJ. 2017. 5y <sup>53</sup>               | USA            | Cohort study | AFP+US/6-12M | No-Screening | CH        | 175/158     | 4.55%  | Yes | NA    | 61.65 | ①②④<br>③      |
| Tong et al. 2010. 6y <sup>54</sup>            | Asian-American | Cohort study | AFP+US/6M    | No-Screening | HBV       | 26/52       | 5.10%  | Yes | 82.10 | 57.20 | ①②④<br>③      |
| Toyoda H. 2018. 5y <sup>55</sup>              | Japan          | Cohort study | AFP+US/NA    | No-Screening | CLD       | 2,108/1,791 | 6.54%  | Yes | 72.40 | 68.75 | ①             |
| Toyoda K, et al. 2006. 5y <sup>56</sup>       | Japan          | Cohort study | US/3-6M      | No-Screening | Cirrhosis | 1050/591    | 36.00% | No  | 25.20 | 64.3  | ①③            |
| Trevisani F, et al. 2004. 3y <sup>57</sup>    | Italy          | Cohort study | AFP+US/6M    | No-Screening | CLD       | 158/138     | 3.04%  | Yes | 64.50 | 74.4  | ①             |
| Trevisani F, et al. 2007. 6y <sup>58</sup>    | USA            | Cohort study | AFP+US/6-12M | No-Screening | Cirrhosis | 252/356     | 22.88% | Yes | 74.80 | 62.88 | ①②③<br>④      |
| Van Meer et al. 2015. 5y <sup>59</sup>        | USA            | Cohort study | AFP+US/6M    | No-Screening | CLD       | 295/779     | NA     | Yes | 75.80 | 62    | ① ②<br>③<br>④ |
| Van Vlierberghe et al. 2005. 1y <sup>60</sup> | Belguim        | Cohort study | US/NA        | No-Screening | Cirrhosis | 47/84       | NA     | Yes | NA    | NA    | ① ②           |
| Wong G et al. 2008. 2y <sup>61</sup>          | China          | Cohort study | AFP+US/6M    | No-Screening | CH        | 79/393      | NA     | Yes | 81.20 | 59.10 | ①             |

|                                           |             |              |                  |              |                   |         |        |    |       |       |     |
|-------------------------------------------|-------------|--------------|------------------|--------------|-------------------|---------|--------|----|-------|-------|-----|
| Wong L et al. 2000.<br>5y <sup>62</sup>   | Asian       | Cohort study | AFP+US/6M        | No-Screening | CLD               | 16/19   | NA     | No | 68.60 | 61.15 | ①②③ |
| Yang JD, et al. 2011.<br>3y <sup>63</sup> | USA         | Cohort study | US/6-12M         | No-Screening | Cirrhosis         | 136/307 | 10.61% | No | 72.00 | 62.00 | ①③  |
| Yeh et al. 2014. 2y <sup>64</sup>         | China       | Cohort study | US/3-6M          | No-Screening | HBV (8,962/2,152) | 16/18   | NA     | No | NA    | NA    | ⑤   |
| Yerokun et al. 2016.<br>1y <sup>65</sup>  | USA         | Cohort study | AFP+US/NA        | No-Screening | Cirrhosis         | 160/220 | NA     | No | 75.00 | 59.80 | ①   |
| Youk et al. 2003. 6y <sup>66</sup>        | USA         | Cohort study | AFP+US/6M        | No-Screening | CLD               | 64/183  | 3.64%  | No | 82.20 | 57.50 | ①②③ |
| Zapata et al. 2010. 2y <sup>67</sup>      | USA         | Cohort study | US/6M            | No-Screening | Cirrhosis         | 40/45   | 25.88% | No | 87.10 | 63.00 | ①   |
| Atiq et al. 2017. 3y <sup>68</sup>        | USA         | Case series  | AFP<br>US/12M    | or<br>NA     | Cirrhosis (680)   | 48      | NA     | No | NA    | NA    | ⑥   |
| Konerman et al. 2019.<br>2y <sup>69</sup> | USA         | Case series  | AFP+US/6-12<br>M | NA           | Cirrhosis (999)   | 69      | NA     | No | 53.60 | 58.00 | ⑥   |
| Frey et al. 2015. 2y <sup>70</sup>        | Switzerland | Case series  | AFP+US/8M        | NA           | cirrhosis (285)   | 9       | NA     | No | 63.0  | 55.00 | ⑥   |

Outcomes of benefits: Outcomes of bene (①, proportion of early HCC; ②, 1-year survival rate; ③, 3-year survival rate; ④, 5-year survival rate; ⑤, mortality); Outcomes of harms (⑥, proportion of physiological harms); S/C = screening/comparator.

Abbreviations: AFP, alpha-fetoprotein; CH, chronic hepatitis (chronic hepatitis included hepatitis B, hepatitis C, alcoholic liver disease and so on); CLD, chronic liver disease (chronic liver disease included chronic hepatitis and cirrhosis); CT, computed tomography; HBV, hepatitis B; HCC, hepatocellular

carcinoma; HCV, hepatitis C; M, screening interval is x months (eg., 3M means screening interval was 3 months); MRI, magnetic resonance imaging; NA, not reported; RCT, random clinical trial; UK, The United Kingdom; US, ultrasound; USA, The United States of America.

**Supplementary Table 3**

Risk-of-bias assessment of RCT (CROB).

| Included studies                            | ①  | ② | ③  | ④  | ⑤  | ⑥ | ⑦  | Total |
|---------------------------------------------|----|---|----|----|----|---|----|-------|
| Chen JG, et al. 2003. 5y. RCT <sup>1</sup>  | 1  | 0 | NA | NA | 0  | 1 | NA | 2     |
| Zhang BH, et al. 2004. 5y. RCT <sup>2</sup> | 1  | 0 | NA | NA | 0  | 1 | NA | 2     |
| Lu J. 2001. 5y. RCT <sup>3</sup>            | NA | 0 | NA | NA | NA | 1 | NA | 1     |
| Ji MF, et al. 2018. 4y. RCT <sup>4</sup>    | 1  | 0 | 0  | 0  | 1  | 1 | NA | 2     |

①, random sequence generation; ②, allocation concealment; ③, blinding of participants and personnel; ④, blinding of assessment; ⑤, complete outcome data; ⑥, selective reporting; ⑦, other bias.

1, low risk; 0, high risk; NA, not available.

Abbreviations: CROB, Cochrane Collaboration's tool; RCT, random clinical trial.

**Supplementary Table 4**

Risk-of-bias assessment of cohort study (NOS).

| Included studies                          | selection |   |   |   | Comparability | Outcome |   |   | Total |
|-------------------------------------------|-----------|---|---|---|---------------|---------|---|---|-------|
|                                           | ①         | ② | ③ | ④ | ⑤             | ⑥       | ⑦ | ⑧ |       |
| Ando et al. 2006. 5y <sup>5</sup>         | 1         | 1 | 0 | 1 | 1             | 0       | 1 | 0 | 5     |
| Bui et al. 2019. 5y <sup>6</sup>          | 1         | 1 | 0 | 1 | 1             | 0       | 1 | 1 | 6     |
| Caumes et al. 2007. 3y <sup>7</sup>       | 1         | 0 | 0 | 1 | 1             | 1       | 1 | 0 | 5     |
| Chaiteerakij et al. 2017. 1y <sup>8</sup> | 1         | 1 | 0 | 1 | 2             | 1       | 1 | 0 | 7     |
| Chen TH, et al. 2002. 7y <sup>9</sup>     | 1         | 1 | 1 | 1 | 2             | 0       | 1 | 1 | 8     |
| Cheung et al. 2006. 3y <sup>10</sup>      | 1         | 1 | 0 | 1 | 1             | 0       | 1 | 0 | 5     |
| Chen JG, 2017. 8y <sup>11</sup>           | 1         | 0 | 1 | 1 | 1             | 0       | 1 | 0 | 5     |
| Chin et al. 2016. 7y <sup>12</sup>        | 1         | 1 | 0 | 1 | 2             | 0       | 1 | 0 | 6     |
| Chinnaratha et al. 2019. 1y <sup>13</sup> | 1         | 1 | 1 | 1 | 1             | 1       | 0 | 0 | 6     |
| Contentin et al. 2016. 4y <sup>14</sup>   | 0         | 1 | 1 | 1 | 1             | 0       | 1 | 0 | 5     |
| Davila et al. 2007. 5y <sup>15</sup>      | 1         | 1 | 1 | 1 | 1             | 1       | 1 | 0 | 7     |
| Demma et al. 2016. 3y <sup>16</sup>       | 1         | 1 | 0 | 1 | 1             | 1       | 1 | 0 | 6     |
| Dixon et al. 2018. 3y <sup>17</sup>       | 1         | 1 | 0 | 1 | 1             | 1       | 1 | 0 | 6     |
| El-Serag et al. 2011. 5y <sup>18</sup>    | 1         | 1 | 1 | 1 | 1             | 1       | 1 | 0 | 7     |
| El-Zayadi, at al. 2010. 5y <sup>19</sup>  | 1         | 1 | 1 | 1 | 2             | 1       | 1 | 0 | 8     |
| Eltabbakh et al. 2015. 5y <sup>20</sup>   | 1         | 0 | 1 | 1 | 2             | 0       | 1 | 0 | 6     |
| Farrell et al. 2015. 4y <sup>21</sup>     | 0         | 1 | 1 | 1 | 1             | 1       | 1 | 0 | 6     |
| Gaba et al. 2013. 4y <sup>22</sup>        | 1         | 1 | 1 | 1 | 1             | 1       | 1 | 0 | 7     |
| Garcia et al. 1995. 3y <sup>23</sup>      | 1         | 1 | 1 | 1 | 1             | 0       | 1 | 0 | 6     |
| Gellert et al. 2007. 10y <sup>24</sup>    | 1         | 1 | 1 | 1 | 1             | 1       | 1 | 0 | 7     |
| Im S, et al. 2019. 4y <sup>25</sup>       | 1         | 1 | 1 | 1 | 2             | 1       | 1 | 0 | 8     |
| Jeffrey et al. 2015. 2y <sup>26</sup>     | 1         | 1 | 1 | 1 | 1             | 1       | 1 | 1 | 8     |
| Jou et al. 2010. 1y <sup>27</sup>         | 1         | 1 | 1 | 1 | 2             | 1       | 1 | 0 | 8     |
| Kemp et al. 2005. 12y <sup>28</sup>       | 1         | 1 | 1 | 1 | 2             | 1       | 1 | 0 | 8     |
| Khalaf et al. 2016. 1y <sup>29</sup>      | 0         | 1 | 1 | 1 | 1             | 0       | 1 | 0 | 5     |
| Kim et al. 2018. 5y <sup>30</sup>         | 1         | 1 | 1 | 1 | 1             | 1       | 1 | 1 | 8     |
| Kuo et al. 2010. 3y <sup>31</sup>         | 1         | 1 | 1 | 1 | 1             | 1       | 1 | 0 | 7     |
| Leykum et al. 2007. 6y <sup>32</sup>      | 1         | 1 | 1 | 1 | 1             | 1       | 1 | 0 | 7     |
| Martínez et al. 1993. 1y <sup>33</sup>    | 1         | 1 | 0 | 1 | 1             | 0       | 1 | 0 | 5     |
| Miguel et al. 2012. 7y <sup>34</sup>      | 1         | 1 | 0 | 1 | 1             | 0       | 1 | 0 | 5     |
| Mittal R, et al. 2016. 2y <sup>35</sup>   | 1         | 1 | 1 | 1 | 1             | 0       | 1 | 0 | 6     |
| Mittal S, et al. 2016. 5y <sup>36</sup>   | 1         | 1 | 1 | 1 | 1             | 1       | 1 | 1 | 8     |
| Noda et al. 2010. 6y <sup>37</sup>        | 1         | 0 | 1 | 1 | 2             | 1       | 1 | 0 | 7     |
| Nusbaum et al. 2015. 2y <sup>38</sup>     | 1         | 1 | 1 | 1 | 1             | 1       | 1 | 1 | 8     |
| Pascual et al. 2008. 1y <sup>39</sup>     | 1         | 1 | 1 | 1 | 1             | 1       | 1 | 0 | 7     |
| Piñero et al. 2019. 5y <sup>40</sup>      | 1         | 1 | 1 | 1 | 1             | 1       | 1 | 0 | 7     |
| Poh et al. 2015. 2y <sup>41</sup>         | 1         | 1 | 1 | 1 | 1             | 1       | 0 | 0 | 6     |
| Rich et al. 2017. 8y <sup>42</sup>        | 1         | 1 | 0 | 1 | 1             | 0       | 1 | 0 | 5     |



|                                                |   |   |   |   |   |   |   |   |   |
|------------------------------------------------|---|---|---|---|---|---|---|---|---|
| Rodríguez et al. 2011. 2y <sup>43</sup>        | 1 | 1 | 1 | 1 | 2 | 1 | 1 | 0 | 8 |
| Sarkar et al. 2012. 11y <sup>44</sup>          | 1 | 1 | 0 | 1 | 1 | 0 | 1 | 1 | 6 |
| Silveira et al. 2008. 7y <sup>45</sup>         | 0 | 1 | 1 | 1 | 1 | 0 | 1 | 0 | 5 |
| Singal et al. 2021. 2y <sup>46</sup>           | 1 | 1 | 1 | 1 | 1 | 1 | 1 | 0 | 7 |
| Stravitz et al. 2008. 8y <sup>47</sup>         | 1 | 0 | 0 | 1 | 2 | 0 | 1 | 0 | 5 |
| Stroffolini et al. 2011. 1y <sup>48</sup>      | 1 | 0 | 1 | 1 | 1 | 1 | 1 | 0 | 6 |
| Tanaka H, et al. 2006. 12y <sup>49</sup>       | 1 | 1 | 1 | 1 | 1 | 1 | 1 | 1 | 8 |
| Tanaka S, et al. 1990. 1y <sup>50</sup>        | 1 | 0 | 1 | 1 | 1 | 0 | 1 | 0 | 5 |
| Taura et al. 2005. 1y <sup>51</sup>            | 1 | 1 | 1 | 1 | 1 | 0 | 1 | 0 | 6 |
| Thein et al. 2015. 10y <sup>52</sup>           | 0 | 1 | 1 | 1 | 1 | 1 | 1 | 1 | 7 |
| Tong MJ, 2017. 5y <sup>53</sup>                | 1 | 1 | 1 | 1 | 1 | 1 | 1 | 1 | 8 |
| Tong et al. 2010. 6y <sup>54</sup>             | 1 | 1 | 1 | 1 | 1 | 0 | 1 | 0 | 6 |
| Toyoda H. 2018. 10y <sup>55</sup>              | 1 | 1 | 1 | 1 | 2 | 1 | 1 | 0 | 8 |
| Toyoda et al. 2006. 5y <sup>56</sup>           | 1 | 1 | 1 | 1 | 1 | 1 | 1 | 0 | 7 |
| Trevisani F. 2004. 3y <sup>57</sup>            | 1 | 1 | 1 | 1 | 1 | 0 | 1 | 0 | 6 |
| Trevisani et al. 2007. 6y <sup>58</sup>        | 0 | 1 | 0 | 1 | 2 | 1 | 1 | 1 | 7 |
| Van Meer, et al. 2015. 5y <sup>59</sup>        | 1 | 1 | 1 | 1 | 1 | 1 | 1 | 0 | 7 |
| Van Vlierberghe, et al. 2005. 1y <sup>60</sup> | 1 | 0 | 0 | 1 | 1 | 0 | 1 | 0 | 4 |
| Wong G, et al. 2008. 2y <sup>61</sup>          | 1 | 1 | 1 | 1 | 1 | 1 | 1 | 0 | 7 |
| Wong L, et al. 2000. 5y <sup>62</sup>          | 1 | 1 | 0 | 1 | 1 | 0 | 1 | 0 | 5 |
| Yang JD, et al. 2011. 3y <sup>63</sup>         | 0 | 1 | 1 | 1 | 1 | 1 | 1 | 1 | 7 |
| Yeh et al. 2014. 2y <sup>64</sup>              | 1 | 1 | 1 | 1 | 1 | 1 | 1 | 0 | 7 |
| Yerokun et al. 2016. 1y <sup>65</sup>          | 1 | 0 | 1 | 1 | 1 | 1 | 1 | 0 | 6 |
| Youk et al. 2003. 6y <sup>66</sup>             | 1 | 1 | 1 | 1 | 1 | 1 | 1 | 0 | 7 |
| Zapata et al. 2010. 2y <sup>67</sup>           | 0 | 1 | 1 | 1 | 1 | 0 | 1 | 0 | 5 |

①, representativeness of the exposed cohort; ②, selection of the non-exposed cohort; ③, ascertainment of exposure; ④, demonstration that outcome of interest was not present at start of study; ⑤, comparability of cohorts on the basis of the design or analysis; ⑥, assessment of outcome; ⑦, follow-up long enough for outcomes to occur; ⑧, adequacy of follow-up of cohorts.

Abbreviation: NOS, Newcastle-Ottawa Scale.

**Supplementary Table 5**

Risk-of-bias assessment of case series studies (NICE).

| Included study                            | NICE items                                                                                           | Score |
|-------------------------------------------|------------------------------------------------------------------------------------------------------|-------|
| Atiq et al. 2017.<br>3y <sup>68</sup>     | 1. Case series collected in more than one centre, i.e. multi-centre study?                           | 1     |
|                                           | 2. Is the hypothesis/aim/objective of the study clearly described?                                   | 1     |
|                                           | 3. Are the inclusion and exclusion criteria (case definition) clearly reported?                      | 1     |
|                                           | 4. Is there a clear definition of the outcomes reported?                                             | 1     |
|                                           | 5. Were data collected prospectively?                                                                | 0     |
|                                           | 6. Is there an explicit statement that patients were recruited consecutively?                        | 1     |
|                                           | 7. Are the main findings of the study clearly described?                                             | 1     |
|                                           | 8. Are outcomes stratified? (e.g., by disease stage, abnormal test results, patient characteristics) | 0     |
|                                           | Total                                                                                                | 6     |
| Konerman et al.<br>2019. 2y <sup>69</sup> | 1. Case series collected in more than one centre, i.e. multi-centre study?                           | 0     |
|                                           | 2. Is the hypothesis/aim/objective of the study clearly described?                                   | 1     |
|                                           | 3. Are the inclusion and exclusion criteria (case definition) clearly reported?                      | 1     |
|                                           | 4. Is there a clear definition of the outcomes reported?                                             | 1     |
|                                           | 5. Were data collected prospectively?                                                                | 0     |
|                                           | 6. Is there an explicit statement that patients were recruited consecutively?                        | 1     |
|                                           | 7. Are the main findings of the study clearly described?                                             | 1     |
|                                           | 8. Are outcomes stratified? (e.g., by disease stage, abnormal test results, patient characteristics) | 0     |
|                                           | Total                                                                                                | 7     |
| Frey et al. 2015.<br>2y <sup>70</sup>     | 1. Case series collected in more than one centre, i.e. multi-centre study?                           | 0     |
|                                           | 2. Is the hypothesis/aim/objective of the study clearly described?                                   | 1     |
|                                           | 3. Are the inclusion and exclusion criteria (case definition) clearly reported?                      | 1     |
|                                           | 4. Is there a clear definition of the outcomes reported?                                             | 0     |

|  |                                                                                                      |   |
|--|------------------------------------------------------------------------------------------------------|---|
|  | 5. Were data collected prospectively?                                                                | 1 |
|  | 6. Is there an explicit statement that patients were recruited consecutively?                        | 1 |
|  | 7. Are the main findings of the study clearly described?                                             | 1 |
|  | 8. Are outcomes stratified? (e.g., by disease stage, abnormal test results, patient characteristics) | 0 |
|  | Total                                                                                                | 5 |

1, yes; 0, no; 8, total score.

Abbreviation: NICE, National institute for clinical excellence.

**Supplementary Table 6**

Subgroup analyses of 1-year survival rate.

| Variables             | Subgroup  | Number of Study | HCC-S | HCC-C | Test of Heterogeneity |                 | Results of meta-analysis |                 | <i>P</i> between Subgroups |
|-----------------------|-----------|-----------------|-------|-------|-----------------------|-----------------|--------------------------|-----------------|----------------------------|
|                       |           |                 |       |       | I <sup>2</sup>        | <i>P</i> -value | RR (95% CI)              | <i>P</i> -value |                            |
| <b>RCTs</b>           |           |                 |       |       |                       |                 |                          |                 |                            |
| Total                 | -         | 3               | 451   | 228   | 72.5                  | 0.012           | 1.72 (1.13-2.61)         | < 0.001         | -                          |
| Screening modalities  | AFP       | 1               | 257   | 117   | -                     | -               | 2.52 (1.38-4.62)         | 0.003           | 0.41                       |
|                       | AFP+US    | 2               | 178   | 101   | 0.0                   | 0.41            | 1.91 (1.42-2.56)         | < 0.001         |                            |
| <b>Cohort studies</b> |           |                 |       |       |                       |                 |                          |                 |                            |
| Total                 | -         | 22              | 2,714 | 3,753 | 58.9                  | 0.001           | 1.47 (1.35-1.59)         | < 0.001         | -                          |
| Screening modalities  | AFP or US | 3               | 96    | 311   | 0.0                   | 0.48            | 1.77 (1.38-2.27)         | < 0.001         | 0.30                       |
|                       | AFP+US    | 12              | 1,916 | 2,589 | 59.3                  | 0.005           | 1.43 (1.31-1.57)         | < 0.001         |                            |
|                       | US        | 7               | 859   | 1,070 | 57.0                  | 0.03            | 1.45 (1.25-1.69)         | < 0.001         |                            |
| Screening population  | HBV       | 2               | 212   | 134   | 70.1                  | 0.07            | 1.37 (1.04-1.80)         | 0.03            | 0.91                       |
|                       | HCV       | 2               | 704   | 369   | 0.0                   | 0.65            | 1.55 (1.32-1.81)         | < 0.001         |                            |
|                       | Cirrhosis | 4               | 564   | 754   | 61.5                  | 0.05            | 1.56 (1.28-1.90)         | < 0.001         |                            |
|                       | CH        | 4               | 580   | 1,178 | 77.9                  | 0.004           | 1.43 (1.17-1.75)         | < 0.001         |                            |
|                       | CLD       | 9               | 787   | 1,510 | 53.6                  | 0.03            | 1.47 (1.29-1.69)         | < 0.001         |                            |

|                            |           |    |       |       |      |         |                  |         |      |
|----------------------------|-----------|----|-------|-------|------|---------|------------------|---------|------|
| Screening intervals        | ≤ 6m      | 13 | 1,314 | 2,425 | 58.1 | 0.004   | 1.42 (1.29-1.56) | < 0.001 | 0.01 |
|                            | 6-12m     | 5  | 1,261 | 1,133 | 0.0  | 0.63    | 1.40 (1.29-1.51) | < 0.001 |      |
|                            | > 12m     | 1  | 44    | 113   | -    | -       | 1.39 (0.99-2.41) | 0.03    |      |
|                            | NA        | 3  | 252   | 299   | 0.0  | 0.98    | 2.25 (1.73-2.92) | < 0.001 |      |
| Adjusting lead-time bias   | Yes       | 7  | 1,284 | 2,468 | 62.5 | 0.001   | 1.36 (1.23-1.50) | < 0.001 | 0.04 |
|                            | No        | 15 | 1,587 | 1,502 | 42.8 | 0.04    | 1.54 (1.39-1.71) | < 0.001 |      |
| Location of study          | Asia      | 6  | 609   | 676   | 63.6 | 0.02    | 1.58 (1.30-1.91) | < 0.001 | 0.10 |
|                            | USA       | 10 | 1,990 | 2,835 | 9.2  | 0.36    | 1.31 (1.24-1.38) | < 0.001 |      |
|                            | Europe    | 3  | 180   | 257   | 0.0  | 0.61    | 1.94 (1.54-2.44) | < 0.001 |      |
|                            | Other     | 3  | 92    | 202   | 7.7  | 0.33    | 1.67 (1.34-2.09) | 0.001   |      |
| Study period               | 2000-2010 | 9  | 748   | 1,418 | 63.1 | 0.01    | 1.64 (1.40-1.92) | < 0.001 | 0.08 |
|                            | 2010-2021 | 13 | 2,123 | 2,552 | 40.8 | 0.06    | 1.57 (1.27-1.78) | < 0.001 |      |
| Proportion of Child Pugh C | < 10%     | 5  | 468   | 562   | 55.9 | 0.06    | 1.38 (1.20-1.59) | < 0.001 | 0.49 |
|                            | ≥ 10%     | 5  | 518   | 766   | 0.0  | 0.77    | 1.41 (1.28-1.56) | < 0.001 |      |
|                            | NA        | 12 | 1,885 | 2,642 | 68.3 | < 0.001 | 1.53 (1.35-1.74) | < 0.001 |      |
| Age                        | 40-50     | 1  | 186   | 82    | -    | -       | 1.59 (1.25-2/10) | < 0.001 | 0.25 |
|                            | 50-60     | 6  | 971   | 1,166 | 78.5 | < 0.001 | 1.54 (1.27-1.87) | < 0.001 |      |
|                            | 60-70     | 8  | 1,057 | 1,741 | 0.0  | 0.67    | 1.32 (1.24-1.41) | < 0.001 |      |

|      |   |      |     |      |       |                  |         |
|------|---|------|-----|------|-------|------------------|---------|
| ≥ 70 | 2 | 149  | 113 | 0.0  | 0.58  | 1.54 (1.20-1.97) | < 0.001 |
| NA   | 5 | 1.73 | 508 | 77.9 | 0.001 | 1.73 (1.24-2.40) | < 0.001 |

---

Abbreviations: AFP, alpha-fetoprotein; CH, chronic hepatitis (chronic hepatitis included hepatitis B, hepatitis C, alcoholic liver disease and so on); CI, confidence interval; CLD, chronic liver disease (chronic liver disease included chronic hepatitis and cirrhosis); HBV, hepatitis B; HCV, hepatitis C; HCC-S, number of patients with hepatocellular carcinoma in screening group; HCC-C, number of patients with hepatocellular carcinoma in non-screening group; m, months; NA, not reported; RCT, random clinical trial; RR, risk ratio; US, ultrasound; USA, The United States of America.

**Supplementary Table 7**

Subgroup analyses of 3-year survival rate.

| Variables             | Subgroup  | Numbers of Study | HCC-S | HCC-C | Test of Heterogeneity |                 | Results of meta-analysis |                 | <i>P</i> between Subgroups |
|-----------------------|-----------|------------------|-------|-------|-----------------------|-----------------|--------------------------|-----------------|----------------------------|
|                       |           |                  |       |       | I <sup>2</sup>        | <i>P</i> -value | RR (95% CI)              | <i>P</i> -value |                            |
| <b>RCTs</b>           |           |                  |       |       |                       |                 |                          |                 |                            |
| Total                 | -         | 3                | 435   | 218   | 10.1                  | 0.33            | 2.86 (1.78-4.58)         | < 0.001         | -                          |
| Screening modalities  | AFP       | 1                | 257   | 117   | -                     | -               | 2.05 (1.07-3.92)         | 0.03            | 0.18                       |
|                       | AFP+US    | 2                | 178   | 101   | 0.0                   | 0.51            | 3.76 (2.04-6.93)         | < 0.001         |                            |
| <b>Cohort studies</b> |           |                  |       |       |                       |                 |                          |                 |                            |
| Total                 | -         | 26               | 5,499 | 6,064 | 68.9                  | < 0.001         | 1.58 (1.42-1.76)         | < 0.001         | -                          |
| Screening modalities  | AFP or US | 3                | 85    | 245   | 3.2                   | 0.36            | 2.05 (1.30-3.21)         | 0.002           | 0.44                       |
|                       | AFP+US    | 13               | 2,376 | 3,369 | 41.3                  | 0.06            | 1.59 (1.42,1.78)         | < 0.001         |                            |
|                       | US        | 10               | 3,038 | 2,450 | 71.0                  | < 0.001         | 1.51 (1.24-1.85)         | < 0.001         |                            |
| Screening population  | HBV       | 3                | 226   | 171   | 0.0                   | 0.47            | 2.11 (1.57-2.84)         | < 0.001         | 0.36                       |
|                       | HCV       | 4                | 902   | 627   | 50.5                  | 0.11            | 1.56 (1.21-2.00)         | 0.001           |                            |
|                       | Cirrhosis | 8                | 2,411 | 2,790 | 84.3                  | < 0.001         | 1.48 (1.23-1.78)         | < 0.001         |                            |
|                       | CH        | 2                | 447   | 698   | 82.5                  | 0.02            | 1.68 (1.10-2.56)         | 0.02            |                            |

|                          |           |    |       |       |      |         |                  |         |         |
|--------------------------|-----------|----|-------|-------|------|---------|------------------|---------|---------|
|                          | CLD       | 10 | 1,483 | 1,778 | 0.0  | 0.547   | 1.56 (1.35-1.80) | < 0.001 |         |
| Screening intervals      | ≤ 6m      | 14 | 3,286 | 3,212 | 54.6 | 0.007   | 2.19 (1.79-2.68) | < 0.001 | 0.57    |
|                          | 6-12m     | 10 | 1,777 | 2,557 | 75.1 | < 0.001 | 1.59 (1.31-1.95) | < 0.001 |         |
|                          | > 12m     | 1  | 44    | 113   | -    | -       | 1.56 (0.89-2.75) | 0.12    |         |
|                          | NA        | 1  | 392   | 182   | -    | -       | 1.64 (1.34-2.00) | < 0.001 |         |
| Adjusting lead-time bias | Yes       | 5  | 1,098 | 1,946 | 57.1 | 0.05    | 1.51 (1.28-1.78) | < 0.001 | 0.04    |
|                          | No        | 21 | 4,401 | 4,118 | 72.2 | < 0.001 | 1.62 (1.42-1.85) | < 0.001 |         |
| Location of study        | Asia      | 8  | 2,685 | 1,458 | 0.0  | 0.73    | 1.83 (1.66-2.01) | < 0.001 | < 0.001 |
|                          | USA       | 14 | 2,650 | 4,337 | 66.2 | < 0.001 | 1.44 (1.28-1.62) | < 0.001 |         |
|                          | Europe    | 2  | 99    | 189   | 67.9 | 0.08    | 1.64 (0.66-4.09) | 0.29    |         |
|                          | Other     | 2  | 65    | 80    | 0.0  | 0.90    | 2.20 (1.28-3.76) | 0.03    |         |
| Study period             | 2000-2010 | 12 | 3,123 | 2,338 | 46.6 | 0.04    | 1.63 (1.43-1.85) | < 0.001 | 0.53    |
|                          | 2010-2021 | 14 | 2,376 | 3,726 | 72.6 | < 0.001 | 1.55 (1.34-1.79) | < 0.001 |         |
| Proportion of Child C    | < 10%     | 7  | 644   | 778   | 69.0 | 0.01    | 1.63 (1.25-2.13) | < 0.001 | 0.39    |
|                          | ≥ 10%     | 8  | 2,257 | 2,747 | 84.5 | < 0.001 | 1.53 (1.25-1.88) | < 0.001 |         |
|                          | NA        | 11 | 2,598 | 2,539 | 32.6 | 0.13    | 1.59 (1.40-1.81) | < 0.001 |         |
| Age                      | 40-50     | 1  | 186   | 82    | -    | -       | 1.59 (1.25-2/10) | < 0.001 | 0.04    |
|                          | 50-60     | 9  | 1,308 | 2,111 | 40.8 | 0.09    | 1.45 (1.25-1.69) | < 0.001 |         |



|       |    |       |       |      |         |                  |         |
|-------|----|-------|-------|------|---------|------------------|---------|
| 60-70 | 10 | 2,401 | 2,379 | 82.3 | < 0.001 | 1.56 (1.27-1.91) | < 0.001 |
| ≥ 70  | 3  | 401   | 469   | 0.0  | 0.40    | 1.53 (1.41-2.38) | < 0.001 |
| NA    | 3  | 1,203 | 1,023 | 39.6 | 0.19    | 1.56 (1.27-1.93) | < 0.001 |

---

Abbreviations: AFP, alpha-fetoprotein; CH, chronic hepatitis (chronic hepatitis included hepatitis B, hepatitis C, alcoholic liver disease and so on); CI, confidence interval; CLD, chronic liver disease (chronic liver disease included chronic hepatitis and cirrhosis); HBV, hepatitis B; HCV, hepatitis C; HCC-S, number of patients with hepatocellular carcinoma in screening group; HCC-C, number of patients with hepatocellular carcinoma in non-screening group; m, months; NA, not reported; RCT, random clinical trial; RR, risk ratio; US, ultrasound; USA, The United States of America.

**Supplementary Table 8**

Subgroup analyses of 5-year survival rate.

| Variables             | Subgroup  | Numbers of Study | HCC-S | HCC-C | Test of Heterogeneity |         | Results of meta-analysis |         | P-value between Subgroup |  |
|-----------------------|-----------|------------------|-------|-------|-----------------------|---------|--------------------------|---------|--------------------------|--|
|                       |           |                  |       |       | I <sup>2</sup>        | P-value | RR (95% CI)              | P-value |                          |  |
| <b>RCTs</b>           |           |                  |       |       |                       |         |                          |         |                          |  |
| Total                 | -         | 3                | 435   | 218   | 28.3                  | 0.25    | 2.76 (1.37-5.54)         | < 0.001 | -                        |  |
| Screening modalities  | AFP       | 1                | 257   | 117   | -                     | -       | 1.38 (0.44-4.38)         | 0.58    | 0.07                     |  |
|                       | AFP+US    | 2                | 175   | 101   | 0.0                   | 0.43    | 2.11 (1.23-11.29)        | < 0.001 |                          |  |
| <b>Cohort studies</b> |           |                  |       |       |                       |         |                          |         |                          |  |
| Total                 | -         | 12               | 2,886 | 3050  | 14.0                  | 0.31    | 1.62 (1.47-1.79)         | < 0.001 | -                        |  |
| Screening modalities  | AFP or US | 1                | 27    | 122   | -                     | -       | 2.71 (0.69-10.66)        | 0.15    | 0.10                     |  |
|                       | AFP+US    | 7                | 1,906 | 1,941 | 39.3                  | 0.13    | 1.80 (1.46-2.12)         | < 0.001 |                          |  |
|                       | US        | 4                | 953   | 987   | 0.0                   | 0.87    | 1.53 (1.37-1.72)         | < 0.001 |                          |  |
| Screening population  | HBV       | 2                | 212   | 134   | 0.0                   | 0.54    | 2.01 (1.35-2.99)         | 0.001   | 0.42                     |  |
|                       | HCV       | 3                | 886   | 571   | 0.0                   | 0.48    | 1.40 (1.15-1.71)         | 0.001   |                          |  |
|                       | Cirrhosis | 3                | 989   | 746   | 0.0                   | 0.53    | 1.58 (1.38-1.80)         | < 0.001 |                          |  |
|                       | CH        | 2                | 477   | 698   | 80.6                  | 0.02    | 1.98 (1.13-3.44)         | 0.02    |                          |  |
|                       | CLD       | 2                | 322   | 901   | 0.0                   | 0.50    | 1.70 (1.40-2.07)         | < 0.001 |                          |  |

|                            |           |   |       |       |      |      |                  |         |      |
|----------------------------|-----------|---|-------|-------|------|------|------------------|---------|------|
| Screening intervals        | ≤ 6m      | 7 | 1,460 | 1,900 | 0.0  | 0.79 | 1.59 (1.44-1.75) | < 0.001 | 0.82 |
|                            | 6-12m     | 3 | 1,007 | 846   | 75.8 | 0.02 | 1.90 (1.11-3.26) | 0.02    |      |
|                            | NA        | 2 | 419   | 304   | 0.0  | 0.43 | 1.58 (1.18-2.11) | 0.002   |      |
| Adjusting lead-time bias   | Yes       | 4 | 1,024 | 1,833 | 48.8 | 0.12 | 1.83 (1.46-2.28) | < 0.001 | 0.17 |
|                            | No        | 8 | 1,862 | 1,217 | 0.0  | 0.65 | 1.54 (1.38-1.72) | < 0.001 |      |
| Location of study          | Asia      | 4 | 728   | 353   | 0.0  | 0.66 | 1.71 (1.37-2.14) | < 0.001 | 0.79 |
|                            | USA       | 6 | 1,786 | 2,367 | 50.2 | 0.07 | 1.64 (1.37-1.96) | < 0.001 |      |
|                            | Other     | 2 | 372   | 330   | 0.0  | 0.43 | 1.56 (1.34-1.83) | < 0.001 |      |
| Study period               | 2000-2010 | 5 | 1,039 | 944   | 0.0  | 0.58 | 1.59 (1.34-1.88) | < 0.001 | 0.73 |
|                            | 2010-2021 | 7 | 1,847 | 2,106 | 39.0 | 0.13 | 1.65 (1.43-1.91) | < 0.001 |      |
| Proportion of Child Pugh C | < 10%     | 4 | 728   | 620   | 61.2 | 0.05 | 1.76 (1.36-2.29) | < 0.001 | 0.79 |
|                            | ≥ 10%     | 2 | 644   | 538   | 9.6  | 0.29 | 1.67 (1.24-2.24) | 0.001   |      |
|                            | NA        | 6 | 1,514 | 1,892 | 0.0  | 0.57 | 1.60 (1.40-1.82) | < 0.001 |      |
| Age                        | 40-50     | 1 | 186   | 82    | -    | -    | 1.59 (1.25-2/10) | < 0.001 | 0.58 |
|                            | 50-60     | 2 | 606   | 384   | 61.8 | 0.11 | 1.59 (1.36-1.77) | < 0.001 |      |
|                            | 60-70     | 4 | 1,044 | 1,321 | 54.1 | 1.10 | 1.70 (1.38-2.09) | < 0.001 |      |
|                            | ≥ 70      | 2 | 376   | 393   | 0.0  | 0.73 | 2.06 (1.32-3.21) | < 0.001 |      |
|                            | NA        | 3 | 674   | 870   | 0.0  | 0.72 | 1.55 (1.36-1.77) | < 0.001 |      |

Abbreviations: AFP, alpha-fetoprotein; CH, chronic hepatitis (chronic hepatitis included hepatitis B, hepatitis C, alcoholic liver disease and so on); CI, confidence interval; CLD, chronic liver disease (chronic liver disease included chronic hepatitis and cirrhosis); HBV, hepatitis B; HCV, hepatitis C; HCC-S, number of patients with hepatocellular carcinoma in screening group; HCC-C, number of patients with hepatocellular carcinoma in non-screening group; m, months; NA, not reported; RCT, random clinical trial; RR, risk ratio; US, ultrasound; USA, The United States of America.

**Supplementary Table 9**

Subgroup analyses of proportion of early HCC.

| Variables             | Subgroup  | Numbers of study | HCC-S | HCC-C  | Test of Heterogeneity |         | Results of meta-analysis |         | P between Subgroup |
|-----------------------|-----------|------------------|-------|--------|-----------------------|---------|--------------------------|---------|--------------------|
|                       |           |                  |       |        | I <sup>2</sup>        | P-value | RR (95% CI)              | P-value |                    |
| <b>RCTs</b>           |           |                  |       |        |                       |         |                          |         |                    |
| Total                 | -         | 4                | 492   | 322    | 50.4                  | 0.11    | 2.68 (1.77-4.06)         | < 0.001 | -                  |
| Screening modalities  | AFP       | 1                | 257   | 117    | -                     | -       | 4.94 (2.35-10.39)        | < 0.001 | 0.08               |
|                       | AFP+US    | 3                | 235   | 205    | 19.8                  | 0.29    | 2.35 (1.66-3.33)         | < 0.001 |                    |
| <b>Cohort studies</b> |           |                  |       |        |                       |         |                          |         |                    |
| Total                 | -         | 50               | 9,908 | 12,433 | 81.6                  | < 0.001 | 2.16 (1.99-2.33)         | < 0.001 | -                  |
| Screening modalities  | AFP or US | 7                | 849   | 1,245  | 74.3                  | 0.001   | 1.89 (1.58-2.27)         | < 0.001 | 0.31               |
|                       | AFP+US    | 21               | 5,934 | 7,174  | 84.7                  | < 0.001 | 2.24 (1.99-2.53)         | < 0.001 |                    |
|                       | US        | 22               | 3,266 | 4,121  | 76.7                  | < 0.001 | 2.15 (1.91-2.45)         | < 0.001 |                    |
| Screening population  | HBV       | 4                | 968   | 603    | 0.0                   | 0.62    | 2.41 (2.09-2.77)         | < 0.001 | 0.53               |
|                       | HCV       | 3                | 322   | 295    | 66.1                  | 0.05    | 2.27 (1.48-3.48)         | < 0.001 |                    |
|                       | CH        | 3                | 375   | 627    | 0.0                   | 0.93    | 2.37 (2.08-2.71)         | < 0.001 |                    |

|                            |           |    |       |       |      |         |                  |         |      |
|----------------------------|-----------|----|-------|-------|------|---------|------------------|---------|------|
|                            | Cirrhosis | 25 | 4,739 | 6,550 | 86.7 | < 0.001 | 2.08 (1.83-2.36) | < 0.001 |      |
|                            | CLD       | 15 | 3,645 | 4,465 | 73.3 | < 0.001 | 2.20 (1.94-2.50) | < 0.001 |      |
| Screening intervals        | ≤ 6m      | 26 | 4,652 | 5,927 | 84.0 | < 0.001 | 2.19 (1.94-2.46) | < 0.001 | 0.82 |
|                            | 6-12m     | 12 | 1,646 | 2,870 | 73.9 | < 0.001 | 2.21(1.90-2.57)  | < 0.001 |      |
|                            | NA        | 12 | 3,751 | 3,843 | 79.3 | < 0.001 | 2.07 (1.77-2.41) | < 0.001 |      |
| Adjusting lead-time bias   | Yes       | 9  | 4,097 | 4,059 | 85.7 | < 0.001 | 2.15 (1.83-2.54) | < 0.001 | 0.89 |
|                            | No        | 41 | 5,952 | 8,581 | 80.1 | < 0.001 | 2.17 (1.98-2.38) | < 0.001 |      |
| Location of study          | Asia      | 13 | 5,067 | 4,322 | 82.7 | < 0.001 | 2.35 (2.04-2.72) | < 0.001 | 0.59 |
|                            | USA       | 23 | 3,699 | 6,216 | 84.0 | < 0.001 | 2.09 (1.86-2.35) | < 0.001 |      |
|                            | Europe    | 9  | 711   | 1,135 | 73.6 | < 0.001 | 2.23 (1.73-2.87) | < 0.001 |      |
|                            | Other     | 5  | 572   | 967   | 81.2 | < 0.001 | 2.05 (1.48-2.86) | < 0.001 |      |
| Study period               | 1990-2000 | 3  | 99    | 240   | 0.0  | 0.68    | 3.04 (2.11-4.37) | < 0.001 | 0.16 |
|                            | 2000-2010 | 15 | 2,784 | 2,820 | 63.5 | < 0.001 | 2.19 (1.94-2.47) | < 0.001 |      |
|                            | 2010-2021 | 32 | 7,166 | 9,580 | 85.4 | < 0.001 | 2.11 (1.91-2.33) | < 0.001 |      |
| Proportion of Child Pugh C | < 10%     | 12 | 4,294 | 3,877 | 79.6 | < 0.001 | 2.20 (1.94-2.50) | < 0.001 | 0.85 |
|                            | ≥ 10%     | 17 | 3,653 | 4,877 | 82.4 | < 0.001 | 2.22 (1.91-2.57) | < 0.001 |      |
|                            | NA        | 21 | 2,102 | 3,886 | 80.7 | < 0.001 | 2.10 (1.83-2.40) | < 0.001 |      |
| Age                        | 50-60     | 13 | 2,469 | 3,845 | 80.2 | < 0.001 | 2.34 (2.00-2.73) | < 0.001 | 0.02 |

|       |    |       |       |      |         |                  |         |
|-------|----|-------|-------|------|---------|------------------|---------|
| 60-70 | 18 | 5,632 | 5,669 | 85.5 | < 0.001 | 2.17 (1.90-2.49) | < 0.001 |
| ≥ 70  | 3  | 307   | 251   | 38.6 | < 0.001 | 2.11 (1.60-2.79) | < 0.001 |
| NA    | 17 | 1,640 | 2,875 | 79.7 | < 0.001 | 2.02 (1.74-2.34) | < 0.001 |

---

Abbreviations: AFP, alpha-fetoprotein; CH, chronic hepatitis (chronic hepatitis included hepatitis B, hepatitis C, alcoholic liver disease and so on); CI, confidence interval; CLD, chronic liver disease (chronic liver disease included chronic hepatitis and cirrhosis); HBV, hepatitis B; HCV, hepatitis C; HCC-S, number of patients with hepatocellular carcinoma in screening group; HCC-C, number of patients with hepatocellular carcinoma in non-screening group; m, months; NA, not reported; RCT, random clinical trial; RR, risk ratio; US, ultrasound; USA, The United States of America

**Supplementary Table 10**

Results of Sensitivity analysis.

| <b>Outcomes</b>         | <b>RR (95% CI)</b>    | <b>High risk bias studies excluded</b>         |
|-------------------------|-----------------------|------------------------------------------------|
| Proportion of early HCC | (1) Before exclude    | Ando et al. 2006. 5y <sup>5</sup>              |
|                         | RR = 2.16 (2.00-2.34) | Caumes et al. 2007. 3y <sup>7</sup>            |
|                         | (2) After exclude     | Cheung et al. 2006. 3y <sup>10</sup>           |
|                         | RR = 2.12 (1.94-2.31) | Khalaf et al. 2016. 1y <sup>29</sup>           |
|                         |                       | Martínez et al. 1993. 1y <sup>33</sup>         |
|                         |                       | Miguel et al. 2012. 7y <sup>34</sup>           |
|                         |                       | Rich et al. 2017. 8y <sup>42</sup>             |
|                         |                       | Stravitz et al. 2008. 8y <sup>47</sup>         |
|                         |                       | Tanaka S, et al. 1990. 1y <sup>50</sup>        |
|                         |                       | Van Vlierberghe, et al. 2005. 1y <sup>60</sup> |
|                         |                       | Wong L, et al. 2000. 5y <sup>62</sup>          |
|                         |                       | Zapata et al. 2010. 2y <sup>67</sup>           |
| 1-year survival rate    | (1) Before exclude    | Wong L, et al. 2000. 5y <sup>62</sup>          |
|                         | RR = 1.47 (1.35-1.59) | Van Vlierberghe, et al. 2005. 1y <sup>60</sup> |
|                         | (2) After exclude     | Chen JG, et al. 2017. 5y <sup>11</sup>         |
|                         | RR = 1.40 (1.30-1.51) |                                                |



|                      |                       |                                         |
|----------------------|-----------------------|-----------------------------------------|
| 3-year survival rate | (1) Before exclude    | Ando et al. 2006. 5y <sup>5</sup>       |
|                      | RR = 1.58 (1.42-1.76) | Chen JG, et al. 2017. 5y <sup>11</sup>  |
| 3-year survival rate | (2) After exclude:    | Costentin et al. 2016. 4y <sup>14</sup> |
|                      | RR = 1.53 (1.37-1.70) | Silveira et al. 2008. 7y <sup>45</sup>  |
|                      |                       | Stravitz et al. 2008. 8y <sup>47</sup>  |
|                      |                       | Wong L, et al. 2000. 5y <sup>62</sup>   |
| 5-year survival rate | (1) Before exclude    | Ando et al. 2006. 5y <sup>5</sup>       |
|                      | RR = 1.62 (1.47-1.79) | Chen JG, et al. 2017. 5y <sup>11</sup>  |
| 5-year survival rate | (2) After exclude:    |                                         |
|                      | RR = 1.63 (1.45-1.79) |                                         |

Abbreviations: CI, confidence interval; HCC, hepatocellular carcinoma; RR, risk ratio.

**Supplementary Table 11**

Results of the quality of evidence.

| Outcomes                | Study design   | NO. study | Rating down quality of evidence |               |             |             | Rating up quality of evidence |              |                       | Quality evidence of |               |
|-------------------------|----------------|-----------|---------------------------------|---------------|-------------|-------------|-------------------------------|--------------|-----------------------|---------------------|---------------|
|                         |                |           | Limitation                      | Inconsistency | Indirection | Imprecision | Reporting bias                | Large effect | Plausible confounding |                     | Dose response |
| HCC mortality           | RCTs           | 3         | -2                              | -2            | 0           | -1          | NA                            | -            | -                     | -                   | Very low      |
|                         | Cohort studies | 3         | 0                               | -1            | 0           | -1          | NA                            | 0            | 0                     | 0                   | Very low      |
| 1-year survival rates   | RCTs           | 3         | -2                              | -2            | 0           | -1          | NA                            | -            | -                     | -                   | Very low      |
|                         | Cohort studies | 22        | 0                               | -1            | 0           | -1          | -1                            | 0            | 0                     | 0                   | Very low      |
| 3-year survival rates   | RCTs           | 3         | -2                              | 0             | 0           | -2          | NA                            | -            | -                     | -                   | Very low      |
|                         | Cohort studies | 26        | 0                               | -2            | 0           | -1          | 0                             | 0            | 0                     | 0                   | Very low      |
| 5-year survival rates   | RCTs           | 3         | -2                              | 0             | 0           | -1          | NA                            | -            | -                     | -                   | Very low      |
|                         | Cohort studies | 12        | 0                               | 0             | 0           | -1          | 0                             | 0            | 0                     | 0                   | Very low      |
| Proportion of early HCC | RCTs           | 4         | -2                              | -1            | 0           | -1          | NA                            | -            | -                     | -                   | Very low      |
|                         | Cohort studies | 50        | 0                               | -2            | 0           | -1          | -2                            | +1           | 0                     | 0                   | Very low      |

**Notes:**

Based on the GRADE guidelines, we considered rating down the quality of evidence of each outcome in the meta-analysis on five dimensions (limitation, inconsistency, indirections, imprecision, reporting bias) or rating up the quality of evidence on three dimensions (large effect, plausible confounding, dose response).

(1) Rating down the quality of evidence:

① Limitation: We evaluated the limitation of each pooled outcome according to the risk of bias of included studies. All the RCTs had high risk of bias, most of cohort studies had low risk of bias. Therefore, the limitations of pooled outcome across RCTs were considered very serious, the limitations downgraded 2 levels, limitation of pooled outcome across cohort studies did not downgrade.

② Inconsistency: We evaluated the inconsistency of each pooled outcome according to the heterogeneity across included studies. If the  $I^2$  was under 30%, the inconsistency was not considered downgrade; if the range of  $I^2$  was 30%-60%, the inconsistency was considered to downgrade 1 level; if the  $I^2$  was over 60%,

the inconsistency was considered downgrade 2 levels.

③ Indirection: Head-to-head meta-analyses were conducted to compare respectively screening to non-screening group, different screening intervals and screening modalities. Therefore, there was no indirect comparison in the meta-analysis.

④ Imprecision: We evaluated the imprecision of each pooled outcome according to the 95% confidence intervals (CIs) and optimal information size (OIS). We found total number of events or patients exceeds the OIS criterion in the all outcomes. If the 95% CI includes appreciable benefit or harm (RR/HR/OR of under 0.75 or over 1.25), rating down for imprecision was considered.

⑤ Reporting bias: We evaluated the reporting bias according to publication bias. Considering the availability of the Egger's test for the symmetry of funnel plots, we only analyzed the publication bias of the pooled outcomes was included the more than 10 studies. Therefore, the publication bias of pooled outcomes included 1-9 studies was not evaluated. If the publication bias was significant, reporting bias was considered to downgrade.

(2) Increase quality of evidence:

According to the GRADE guidelines, increasing quality of evidence was be applied generally to the observational studies.

① Large effect: If the RR of under 0.5 or over 2 based on consistent evidence from at least 2 studies, considering to upgrade 1 level; If the RR of under 0.2 or over 5 based on direct evidence with no major threats to validity, considering to upgrade 2 levels.

② Plausible confounding: We only pooled the outcome rates of the screening group and the non-screening group without adjusting plausible confounding. Therefore, we did not upgrade GRADE levels because adjusting plausible confounding factors all the pooled outcomes.

③ Dose response: There was no dose response among all the pooled outcomes

**Proportion of physiological harm:** GRADE is only for pooled evidence from comparative studies such as RCTs and cohort studies, while the proportion of physiological harm was provided by non-comparative studies. Therefore, it was not evaluated using GRADE. However, there is a great heterogeneity in pooled proportion of physiological harm so it is necessary to be cautious in quoting it.

Abbreviations: HCC, hepatocellular carcinoma; NA, not reported; RCT, random clinical trial.

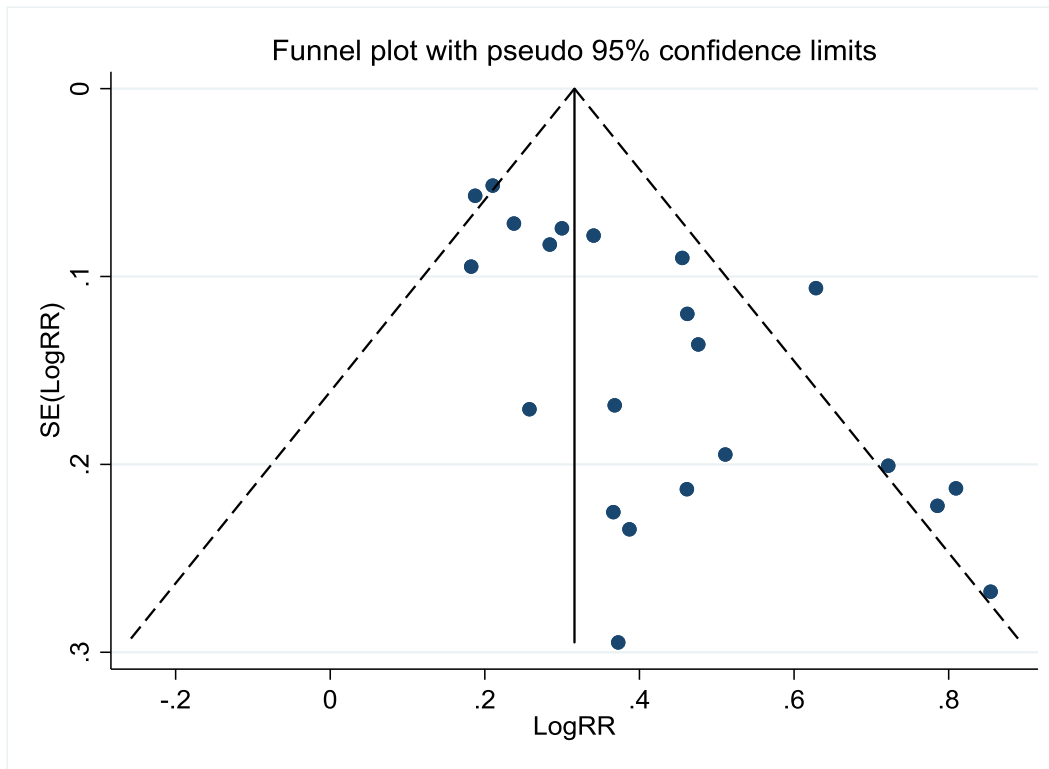

**Supplementary Fig. 1.** Funnel plot of pooled 1-year survival rate of cohort studies.  $P$  of Egger's test  $\leq 0.001$ .

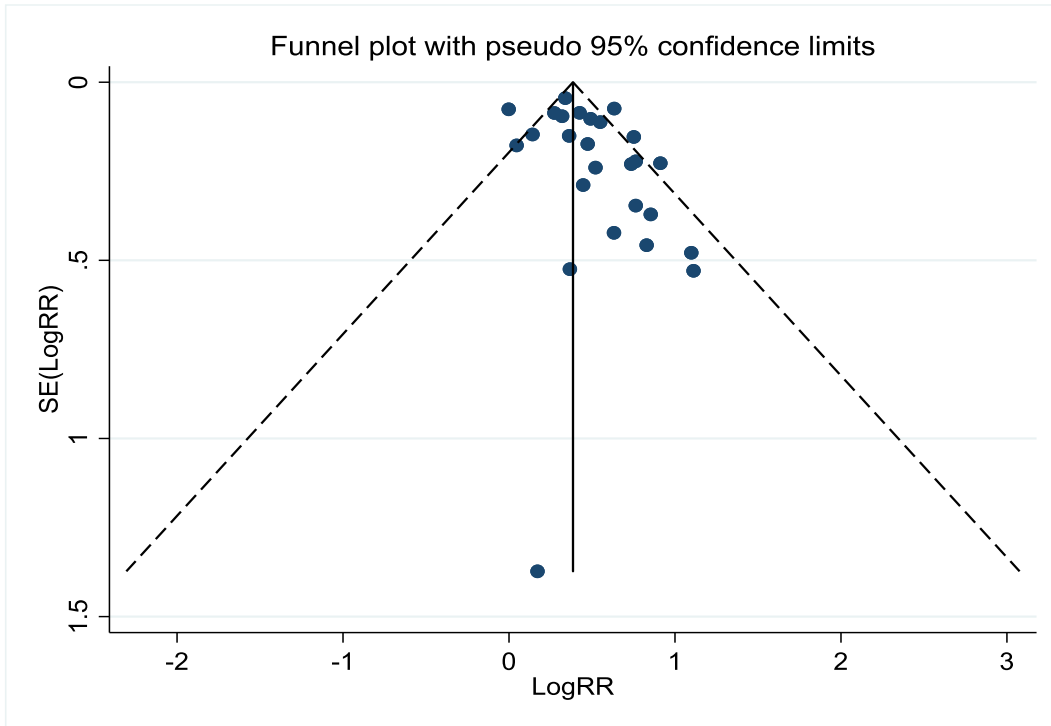

**Supplementary Fig. 2.** Funnel plot of pooled 3-year survival rate of cohort studies. *P* of Egger's test = 0.06.

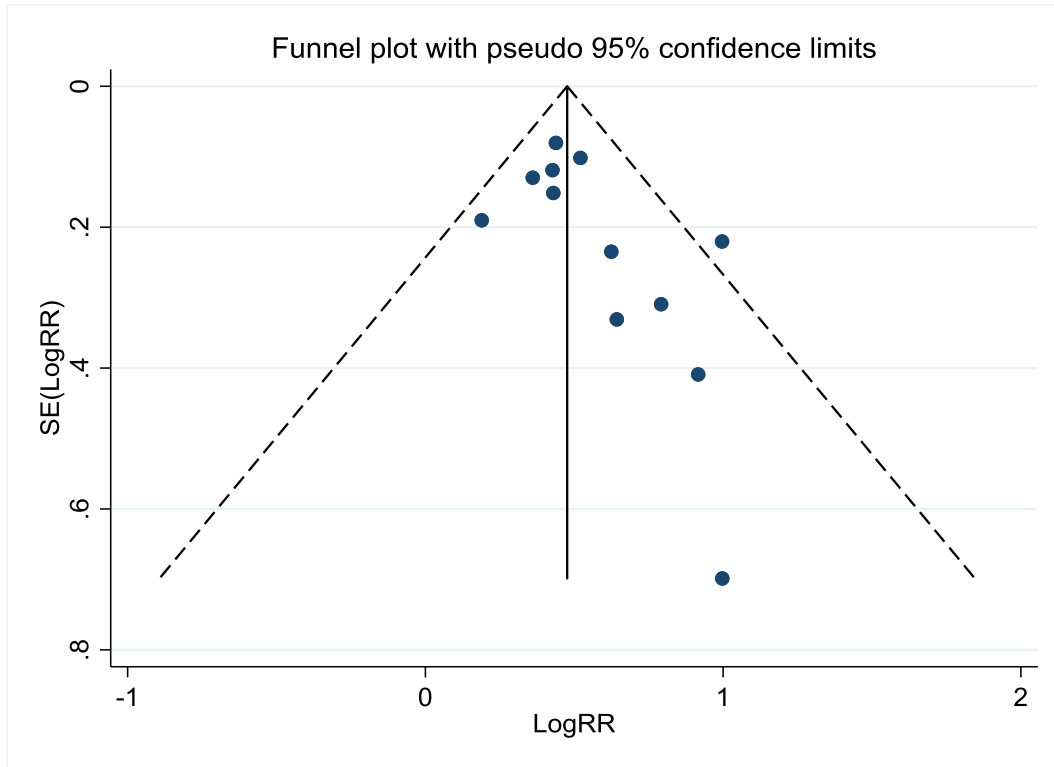

**Supplementary Fig. 3.** Funnel plot of pooled 5-year survival rate of cohort studies. *P* of Egger's test = 0.07.

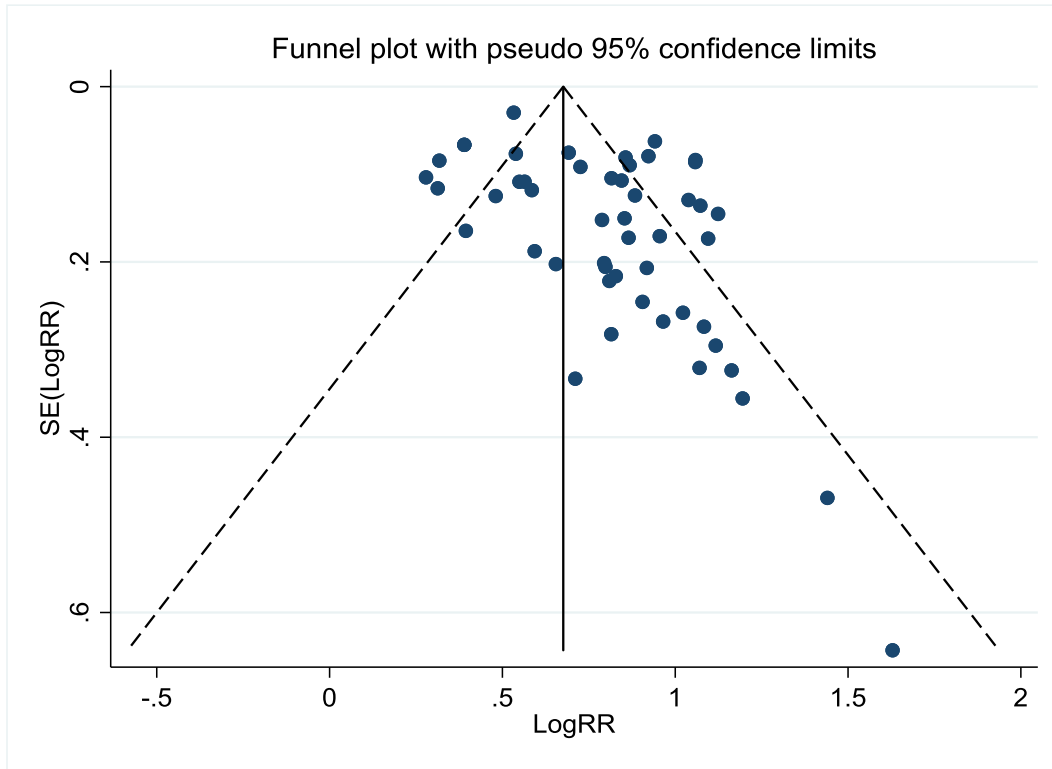

**Supplementary Fig. 4.** Funnel plot of pooled proportion early HCC of cohort studies. *P* of Egger's test = 0.002.

## References

1. Chen JG, Parkin DM, Chen QG, et al. Screening for liver cancer: results of a randomised controlled trial in Qidong, China. *J Med Screen*. 2003;10(4):204-209. doi: 10.1258/096914103771773320.
2. Zhang BH, Yang BH, Tang ZY. Randomized controlled trial of screening for hepatocellular carcinoma. *J Cancer Res Clin Oncol*. 2004;130(7):417-422.
3. Lu J, Shu YX, Lin WY, et al. Study of AFP and bimaging monitor diagnosis of small hepatocellular carcinoma in high-risk hepatocellular subjects. *J Applied Radiology*. 2001(6):405-407.
4. Ji M, Liu Z, Chang ET, et al. Mass screening for liver cancer: results from a demonstration screening project in Zhongshan City, China. *Sci Rep*. 2018;8(1):12787. doi: 10.1038/s41598-018-31119-9.
5. Ando E, Kuromatsu R, Tanaka M, et al. Surveillance program for early detection of hepatocellular carcinoma in Japan: results of specialized department of liver disease. *J Clin Gastroenterol*. 2006;40(10):942-948.
6. Bui CN. Impact of surveillance and early-stage versus late-stage hepatocellular carcinoma (HCC) detection on patient overall survival 2019.
7. Caumes JL, Noursbaum JB, Bessaguet C, et al. Epidemiology of hepatocellular carcinoma in Finistere. Prospective study from June 2002 to May 2003. *Gastroenterol Clin Biol*. 2007;31(3):259-264.
8. Chaiteerakij R, Chattieng P, Choi J, et al. Surveillance for Hepatocellular Carcinoma Reduces Mortality: an Inverse Probability of Treatment Weighted Analysis. *Ann Hepatol*. 2017;16(3):421-429. doi: 10.5604/16652681.1235485.
9. Chen TH, Chen CJ, Yen MF, et al. Ultrasound screening and risk factors for death from hepatocellular carcinoma in a high risk group in Taiwan. *Int J Cancer*. 2002;98(2):257-261.
10. Cheung TK, Lai CL, Wong BC, et al. Clinical features, biochemical parameters, and virological profiles of patients with hepatocellular carcinoma in Hong Kong. *Aliment Pharmacol Ther*. 2006;24(4):573-583. doi: 10.1111/j.1365-2036.2006.03029.x.
11. Chen JG, Zhang YH, Zhu J, et al. Early diagnosis and early treatment for liver cancer in Qidong: survival of patients and effectiveness of screening. *Chin J Oncol*. 2017(12):946-951.
12. Chin J, Cheng W, Kong J, et al. The effect of omitting alfa-fetoprotein in surveillance of hepatocellular carcinoma. *J Gastroenterol Hepatol*. 2016;31:97. doi: 10.1111/jgh.13520.
13. Chinnaratha MA, Campbell K, Mathias R, et al. Improved Survival of Hepatocellular Carcinoma Patients Diagnosed with a Dedicated Screening Programme-a Propensity Score Adjusted Analysis. *J Gastrointest Cancer*. 2019;50(4):888-893. doi: 10.1007/s12029-018-0171-7. PubMed PMID: 30345486.
14. Costentin C, Layese R, Bourcier V, et al. Prospective evidence that hepatocellular carcinoma surveillance in patients with compensated viral cirrhosis increases the probability of curative treatment and survival taking into account lead-time bias (ANRS CO12 CIRVIR cohort). *J Hepatol*. 2016;64(2):S194-S195.
15. Davila JA, Weston A, Smalley W, et al. Utilization of screening for hepatocellular carcinoma in the United States. *J Clin Gastroenterol*. 2007;41(8):777-782.
16. Demma S, O'Donoghue P, O'Beirne J, et al. False-negative liver ultrasound limits benefits of HCC



- surveillance. *J Hepatol.* 2016;64(2):S340-S341.
17. Dixon S, Longhurst A, Murgatroyd J, et al. Hepatocellular carcinoma (HCC) surveillance in clinical practice: A district general hospital single-centre experience. *Gut.* 2018;67:A123. doi: 10.1136/gutjnl-2018-BSGAbstracts.245.
  18. El-Serag HB, Kramer JR, Chen GJ, et al. Effectiveness of AFP and ultrasound tests on hepatocellular carcinoma mortality in HCV-infected patients in the USA. *Gut.* 2011;60(7):992-997. doi: 10.1136/gut.2010.230508. Epub 2011 Jan 21.
  19. El-Zayadi AR, Badran HM, Shawky S, et al. Effect of surveillance for hepatocellular carcinoma on tumor staging and treatment decisions in Egyptian patients. *Hepatol Int.* 2010;4(2):500-506. doi: 10.1007/s12072-010-9170-x.
  20. Eltabbakh M, Zaghla H, Abdel-Razek W, et al. Utility and cost-effectiveness of screening for hepatocellular carcinoma in a resource-limited setting. *Med Oncol.* 2015;32(4):432-437. doi: 10.1007/s12032-015-0534-x. PubMed PMID: 25707770.
  21. Farrell C, Cross TJ, Halpen A, et al. The evaluation of an automated recall programme for surveillance liver ultrasound in patients at increased risk of hepatocellular carcinoma. *J Hepatol.* 2015;62:S443-S444.
  22. Gaba RC, Kallwitz ER, Parvinian A, et al. Imaging surveillance and multidisciplinary review improves curative therapy access and survival in HCC patients. *Ann Hepatol.* 2013;12(5):766-773.
  23. Garcia Gullon C, Rendon Unceta P, Martin Herrera L, et al. [Usefulness of ultrasonography in the early diagnosis of hepatocarcinoma in patients with liver cirrhosis]. *Rev Esp Enferm Dig.* 1995;87(11):798-801.
  24. Gellert L, Jalaludin B, Levy M. Hepatocellular carcinoma in Sydney South West: late symptomatic presentation and poor outcome for most. *Intern Med J.* 2007;37(8):516-522.
  25. Im S, Jang ES, Lee JH, et al. Surveillance rate and its impact on survival of hepatocellular carcinoma patients in South Korea: a cohort study. *Cancer Research and Treatment. Cancer Res Treat.* 2019;51(4):1357-1369.
  26. Nusbaum JD, Smirniotopoulos J, Wright HC, et al. The Effect of Hepatocellular Carcinoma Surveillance in an Urban Population With Liver Cirrhosis. *J Clin Gastroenterol.* 2015 Nov-Dec;49(10):e91-e95. doi: 10.748/wjg.v21.i10.
  27. Jou JH, Chen PH, Jazwinski A, et al. Rates of surveillance and management of hepatocellular carcinoma in patients evaluated at a liver transplant center. *Dig Dis Sci.* 2010;55(12):3591-3596. doi: 10.1007/s10620-010-1366-3.
  28. Kemp W, Pianko S, Nguyen S, et al. Survival in hepatocellular carcinoma: Impact of screening and etiology of liver disease. *J Gastroenterol Hepatol.* 2005;20(6):873-881. doi: 10.1111/j.1400-1746.2005.03844.x.
  29. Khalaf N, Ying J, Mittal S, et al. Natural History of Untreated HCC in a US Cohort and the Role of Cancer Surveillance. *Gastroenterology.* 2016;150(4):S1130.
  30. Kim HY, Nam JY, Lee JH, et al. Intensity of surveillance for hepatocellular carcinoma determines survival in patients at risk in a hepatitis B-endemic area. *Aliment Pharmacol Ther.* 2018;47(11):1490-1501. doi: 10.1111/apt.14623.
  31. Kuo YH, Lu SN, Chen CL, et al. Hepatocellular carcinoma surveillance and appropriate treatment options improve survival for patients with liver cirrhosis. *Eur J Cancer.* 2010;46(4):744-751. doi: 10.1016/j.ejca.2009.12.018.
  32. Leykum LK, El-Serag HB, Cornell J, et al. Screening for hepatocellular carcinoma among veterans

- with hepatitis C on disease stage, treatment received, and survival. *Clin Gastroenterol Hepatol.* 2007;5(4):508-512.
33. Martínez Cerezo FJ, Puig M, Martínez Noguera A, et al. Value of ultrasonography in the early diagnosis of hepatocellular carcinoma. *Rev Esp Enferm Dig.* 1993;84(5):311-314.
  34. Miquel M, Sopena J, Vergara M, et al. Factors related to survival in hepatocellular carcinoma in the geographic area of Sabadell (Catalonia, Spain). *Rev Esp Enferm Dig.* 2012;104(5):242-247.
  35. Mittal R, Sahota A, Tung J, et al. Impact of screening on survival in hepatocellular carcinoma patients with chronic hepatitis B-A regional U.S. population based study. *Hepatology.* 2016;64(1):669A.
  36. Mittal S, Kanwal F, Ying J, et al. Effectiveness of surveillance for hepatocellular carcinoma in clinical practice: A United States cohort. *J Hepatol.* 2016;65(6):1148-1154. doi: 10.1016/j.jhep.2016.07.025.
  37. Noda I, Kitamoto M, Nakahara H, et al. Regular surveillance by imaging for early detection and better prognosis of hepatocellular carcinoma in patients infected with hepatitis C virus. *J Gastroenterol.* 2010;45(1):105-112. doi: 10.1007/s00535-009-0131-x.
  38. Nusbaum JD, Smirniotopoulos J, Wright HC, et al. The effect of hepatocellular carcinoma surveillance in an urban population with liver cirrhosis. *J Clin Gastroenterol.* 2015;49(10):e91-e95.
  39. Pascual S, Irurzun J, Zapater P, et al. Usefulness of surveillance programmes for early diagnosis of hepatocellular carcinoma in clinical practice. *Liver Int.* 2008;28(5):682-689. doi: 10.1111/j.1478-3231.2008.01710.x.
  40. Piñero F, Rubinstein F, Marciano S, et al. Surveillance for Hepatocellular Carcinoma: Does the Place Where Ultrasound Is Performed Impact Its Effectiveness? *Dig Dis Sci.* 2019;64(3):718-728. doi: 10.1007/s10620-018-5390-z.
  41. Poh Z, Goh BB, Chang PE, et al. Surveillance for hepatocellular carcinoma in a mixed-aetiology UK cohort with cirrhosis: does alpha-fetoprotein still have a role? *Eur J Gastroenterol Hepatol.* 2015;27(6):638-643. doi: 10.1097/MEG.0000000000000341.
  42. Rich NE, Yopp AC, Marrero JA, et al. Hepatocellular carcinoma surveillance using ultrasound and afp improves early detection and survival in patients with cirrhosis. *Hepatology.* 2017;66:730A.
  43. Rodríguez RG, Gutiérrez MR, de Frutos CG, et al. Características clínicas, estadificación y tratamiento de los pacientes con carcinoma hepatocelular en la práctica clínica. Estudio prospectivo de una serie de 136 pacientes. *Gastroenterol Hepatol.* 2011;34(8):524-531.
  44. Sarkar M, Stewart S, Yu A, et al. Hepatocellular carcinoma screening practices and impact on survival among hepatitis B-infected Asian Americans. *J Viral Hepat.* 2012;19(8):594-600. doi: 10.1111/j.1365-2893.2011.01577.x. Epub 2012 Jan 28.
  45. Silveira MG, Suzuki A, Lindor KD. Surveillance for hepatocellular carcinoma in patients with primary biliary cirrhosis. *Hepatology.* 2008;48(4):1149-1156.
  46. Singal AG, Patibandla S, Obi J, et al. Benefits and Harms of Hepatocellular Carcinoma Surveillance in a Prospective Cohort of Patients With Cirrhosis. *Clin Gastroenterol Hepatol.* 2021;19(9):1925-1932.e1. doi: 10.1016/j.cgh.2020.09.014.
  47. Stravitz RT, Heuman DM, Chand N, et al. Surveillance for hepatocellular carcinoma in patients with cirrhosis improves outcome. *Am J Med.* 2008;121(2):119-126.
  48. Stroffolini T, Trevisani F, Pinzello G, et al. Changing aetiological factors of hepatocellular carcinoma and their potential impact on the effectiveness of surveillance. *Dig Liver Dis.* 2011;43(11):875-880.

49. Tanaka H, Nouse K, Kobashi H, et al. Surveillance of hepatocellular carcinoma in patients with hepatitis C virus infection may improve patient survival. *Liver Int.* 2006;26(5):543-551. doi: 10.1111/j.1478-3231.2006.01270.x.
50. Tanaka S, Kitamura T, Nakanishi K, et al. Effectiveness of periodic checkup by ultrasonography for the early diagnosis of hepatocellular carcinoma. *Cancer.* 1990;66(10):2210-2214.
51. Taura N, Hamasaki K, Nakao K, et al. Clinical benefits of hepatocellular carcinoma surveillance: a single-center, hospital-based study. *Oncol Rep.* 2005;14(4):999-1003.
52. Thein HH, Campitelli MA, Yeung LT, et al. Improved Survival in Patients with Viral Hepatitis-Induced Hepatocellular Carcinoma Undergoing Recommended Abdominal Ultrasound Surveillance in Ontario: A Population-Based Retrospective Cohort Study. *PLoS One.* 2015;10(9):e0138907. doi: 10.1371/journal.pone. eCollection 2015.
53. Tong MJ, Rosinski AA, Huynh CT, et al. Long-term survival after surveillance and treatment in patients with chronic viral hepatitis and hepatocellular carcinoma. *Hepatol Commun.* 2017;1(7):595-608.
54. Tong MJ, Sun HE, Hsien C, et al. Surveillance for hepatocellular carcinoma improves survival in Asian-American patients with hepatitis B: Results from a community-based clinic. *Dig Dis Sci.* 2010;55(3):826-835. doi: 10.1007/s10620-009-1059-y.
55. Toyoda H, Kumada T, Tada T, et al. Impact of hepatocellular carcinoma aetiology and liver function on the benefit of surveillance: A novel approach for the adjustment of lead-time bias. *Liver Int.* 2018;38(12):2260-2268.
56. Toyoda H, Kumada T, Kiriya S, et al. Impact of surveillance on survival of patients with initial hepatocellular carcinoma: a study from Japan. *Clin Gastroenterol Hepatol.* 2006;4(9):1170-1176.
57. Trevisani F, Cantarini MC, Labate AM, et al. Surveillance for hepatocellular carcinoma in elderly Italian patients with cirrhosis: effects on cancer staging and patient survival. *Am J Gastroenterol.* 2004;99(8):1470-1476. doi: 10.1111/j.1572-0241.2004.30137.x.
58. Trevisani F, Santi V, Gramenzi A, et al. Surveillance for early diagnosis of hepatocellular carcinoma: is it effective in intermediate/advanced cirrhosis? *Am J Gastroenterol.* 2007;102(11):2448-2457; quiz 58. doi: 10.1111/j.572-0241.2007.01395.x.
59. Van Meer S, De Man RA, Coenraad MJ, et al. Surveillance for hepatocellular carcinoma is associated with increased survival: Results from a large cohort in the Netherlands. *J Hepatol.* 2015;63(5):1156-1163. doi: 10.1016/j.jhep.2015.06.012.
60. Van Vlierberghe H, Colle I, Henrion J, et al. The HepCar registry: report on a one-year registration program of hepatocellular carcinoma (HCC) in Belgium. What is daily practice in HCC? *Acta Gastroenterol Belg.* 2005;68(4):403-411.
61. Wong GLH, Wong VWS, Tan GM, et al. Surveillance programme for hepatocellular carcinoma improves the survival of patients with chronic viral hepatitis. *Liver Int.* 2008;28(1):79-87. doi: 10.1111/j.1478-3231.2007.01576.x.
62. Wong LL, Limm WM, Severino R, et al. Improved survival with screening for hepatocellular carcinoma. *Liver Transpl.* 2000;6(3):320-325. doi: 10.1053/iv.2000.4875.
63. Yang JD, Harmsen WS, Slettedahl SW, et al. Factors that affect risk for hepatocellular carcinoma and effects of surveillance. *Clin Gastroenterol Hepatol.* 2011;9(7):617-623.e1. doi: 10.1016/j.cgh.2011.03.027.
64. Yeh YP, Hu TH, Cho PY, et al. Evaluation of abdominal ultrasonography mass screening for hepatocellular carcinoma in Taiwan. *Hepatology.* 2014;59(5):1840-1849. doi: 10.1002/hep.26703.

65. Yerokun OA, Parikh ND, Scaglione SJ, et al. HCC surveillance is associated with early tumor detection and improved survival: A multi-center United States study. *Gastroenterology*. 2016;150(4):S1138.
66. Youk CM, Choi MS, Paik SW, et al. [Early diagnosis and improved survival with screening for hepatocellular carcinoma]. *Taehan Kan Hakhoe Chi*. 2003;9(2):116-123.
67. Zapata E, Zubiaurre L, Castiella A, et al. Are hepatocellular carcinoma surveillance programs effective at improving the therapeutic options. *Rev Esp Enferm Dig*. 2010;102(8):484-488.
68. Atiq O, Tiro J, Yopp AC, et al. An assessment of benefits and harms of hepatocellular carcinoma surveillance in patients with cirrhosis. *Hepatology*. 2017;65(4):1196-1205. doi: 10.1002/hep.28895.
69. Konerman MA, Verma A, Zhao B, et al. Frequency and outcomes of abnormal imaging in patients with cirrhosis enrolled in a hepatocellular carcinoma surveillance program. *Liver Transpl*. 2019;25(3):369-379.
70. Frey RS, Boldanova T, Heim M. Ultrasound surveillance for hepatocellular carcinoma: real-life performance in a hepatology outpatient clinic. *Swiss Med Wkly*. 2015;145:w14200. doi: 10.4414/smw.2015.14200.
